# Supplementary material for: Machine learning reveals diverse cell death patterns in lung adenocarcinoma prognosis and therapy
Source: PubMed Central journal article supplement (PMC10897292; doi:10.1038/s41698-024-00538-5), 2024-02-26
Supplement: 41698_2024_538_MOESM1_ESM.pdf [file 41698_2024_538_MOESM1_ESM.pdf]

# Supplementary Figures

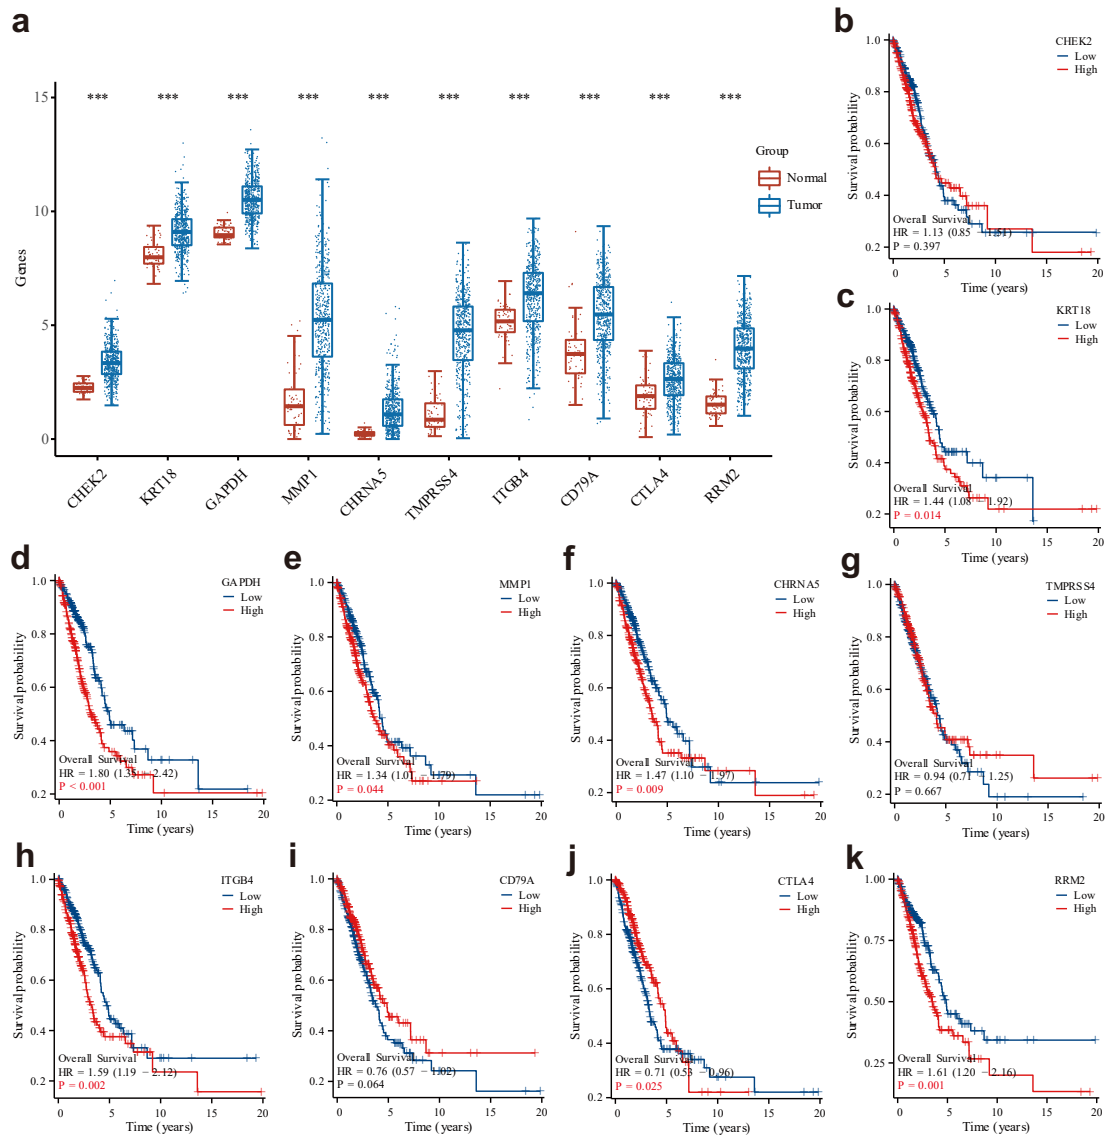

**Supplementary Figure 1: Differential Expression and Survival Analysis of PCDS**

**in LUAD.** (a) Wilcoxon test of PCDS expression between LUAD tissues (blue) and normal samples (red) in TCGA-LUAD cohort.  $***P < 0.001$ . (b-k) Kaplan-Meier analysis of PCDS in TCGA-LUAD cohort (blue: low-expression group; red: high-expression group).

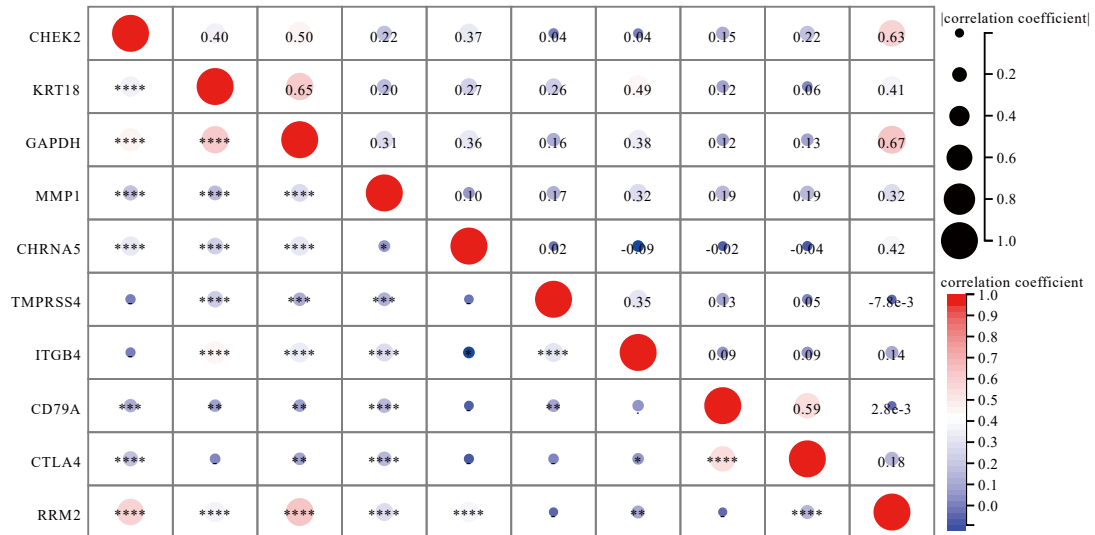

**Supplementary Figure 2. The Correlation of Model Genes.** Pearson's correlation coefficients ( $r$ ) for all model genes are shown in the plot.  $*P < 0.05$ ,  $**P < 0.01$ ,  $***P < 0.0001$ .

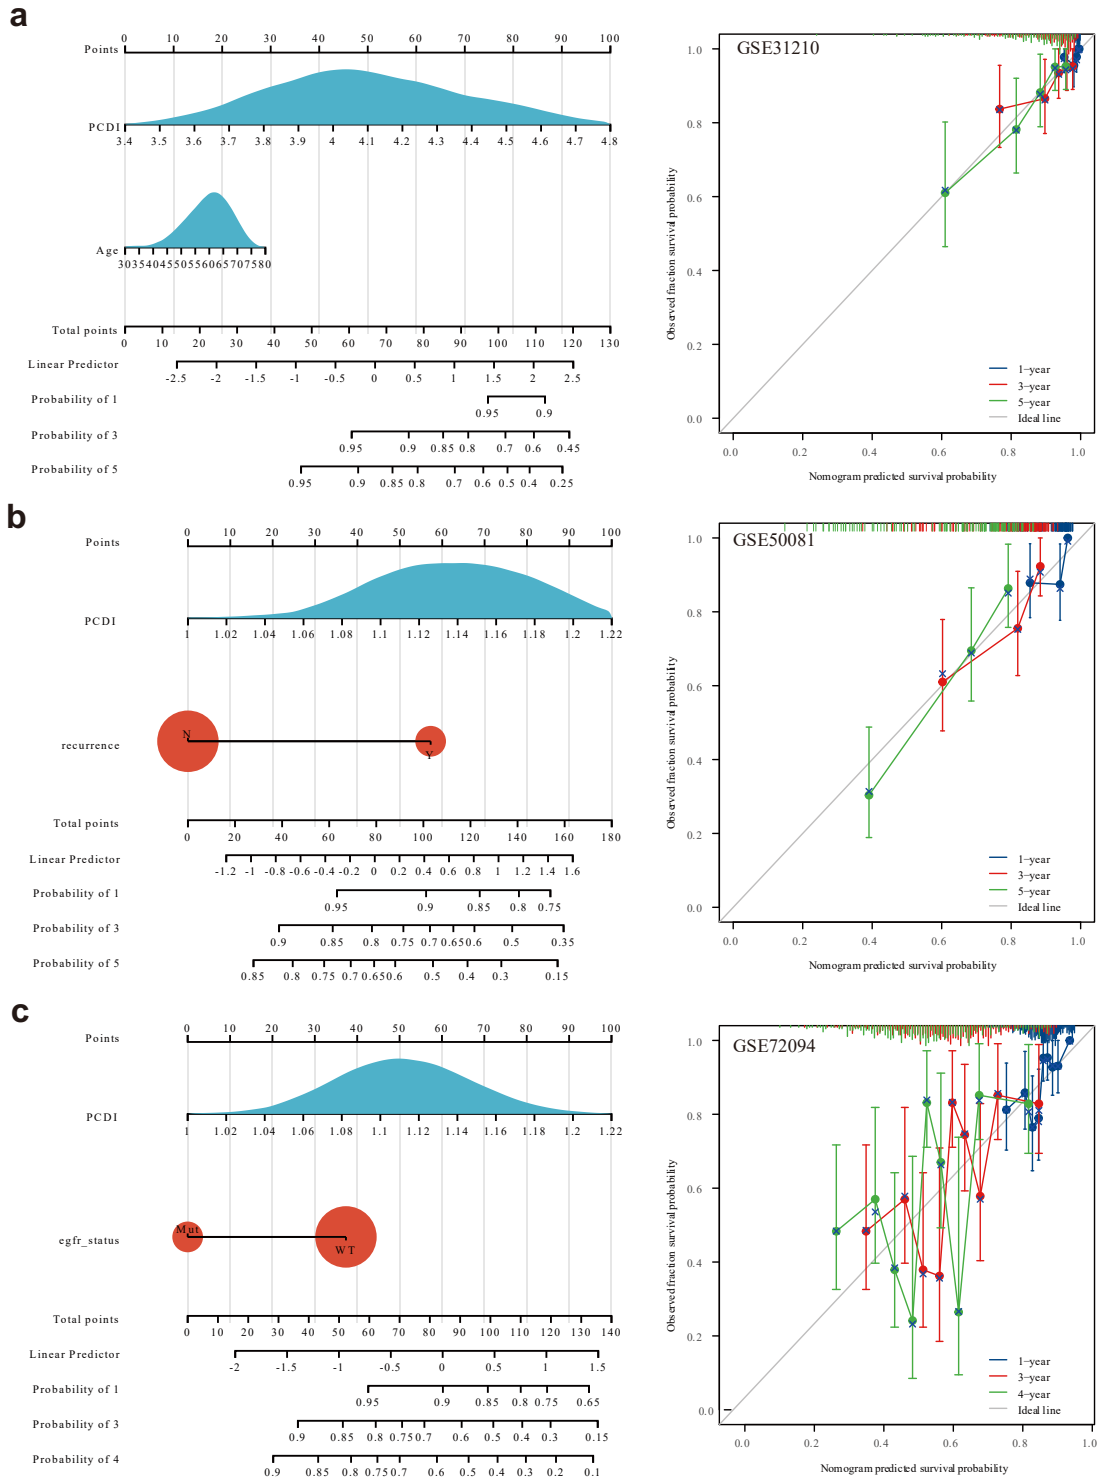

**Supplementary Figure 3: Clinical Significance of the PCDI in the Validation Cohort.** Construction and validation of the prognostic nomogram model in (a) GSE31210, (b) GSE50081, and (c) GSE72094 cohorts.

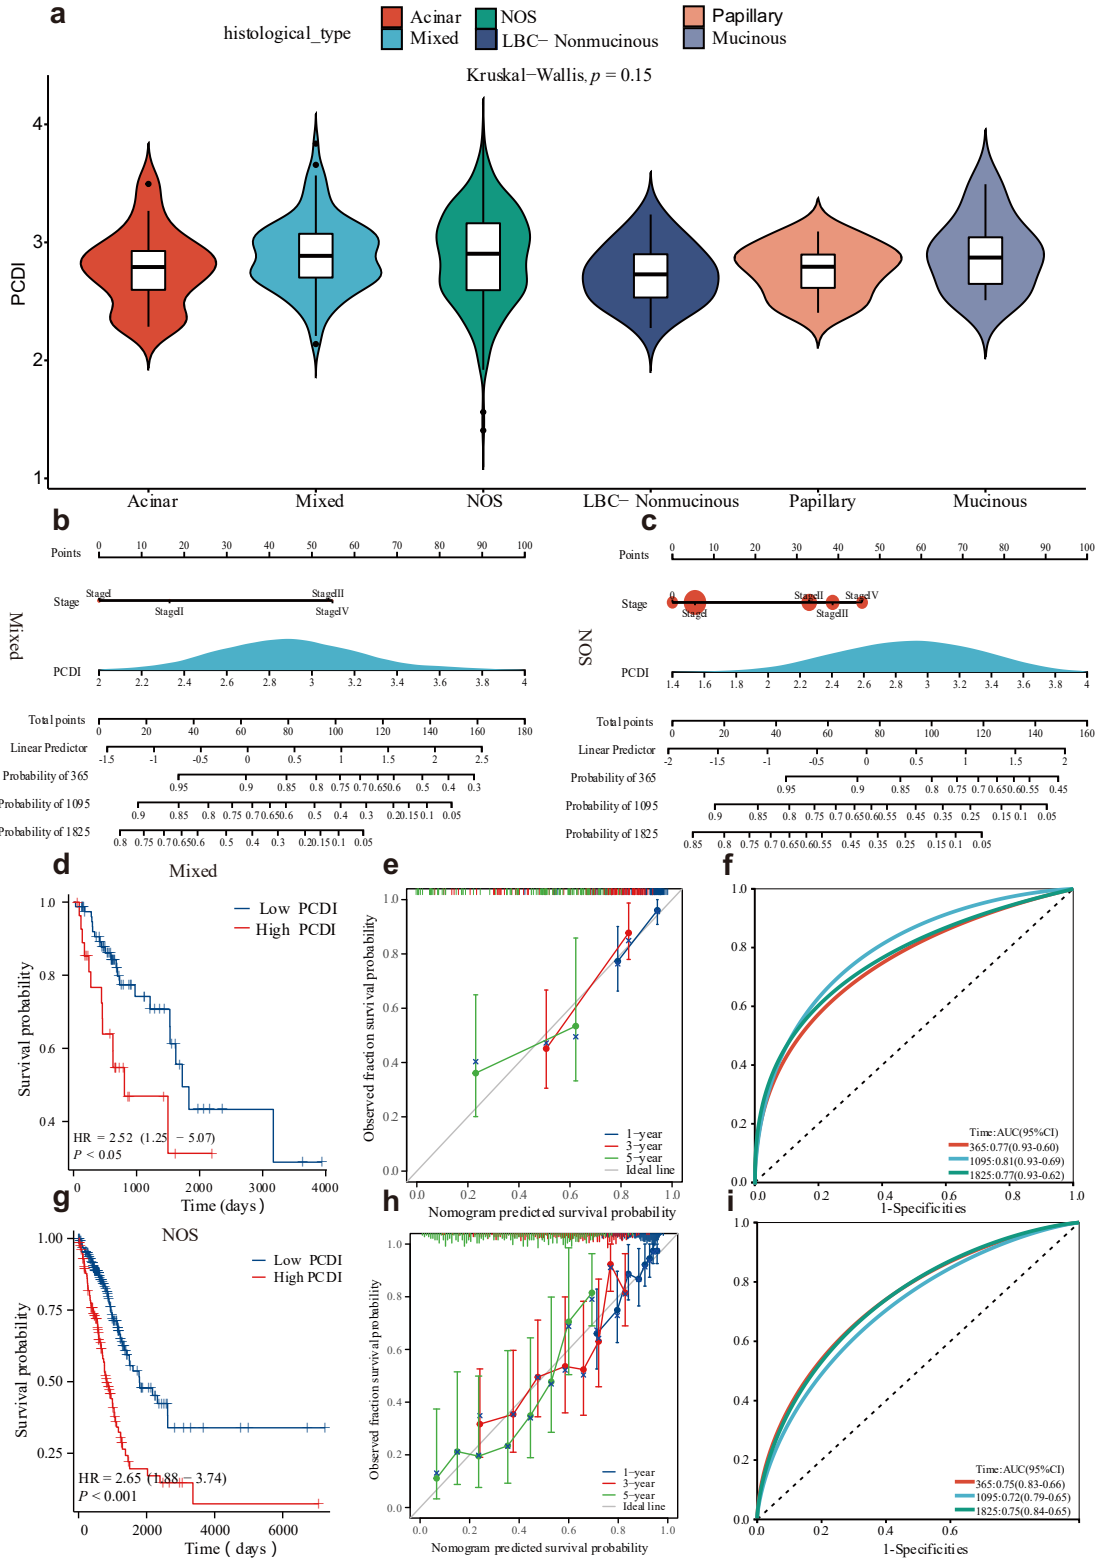

**Supplementary Figure 4: Analysis of LUAD subtype.** (a) violin plot of PCDI among 6 main LUAD subtypes. (b-c) Construction of nomogram model in Mixed and NOS subtype. (d) Kaplan-Meier analysis of the prognosis of LUAD Mixed patients. (e)

Calibration plots of the probability of 1-, 3-, and 5-year overall survival in the Mixed subtype. (f) Receiver operator characteristic (ROC) analysis of the nomogram in Mixed subtype. (g)Kaplan–Meier analysis of the prognosis of LUAD NOS patients. (h) Calibration plots of the probability of 1-, 3-, and 5-year overall survival in the NOS subtype. (i) Receiver operator characteristic (ROC) analysis of the nomogram in the NOS subtype.

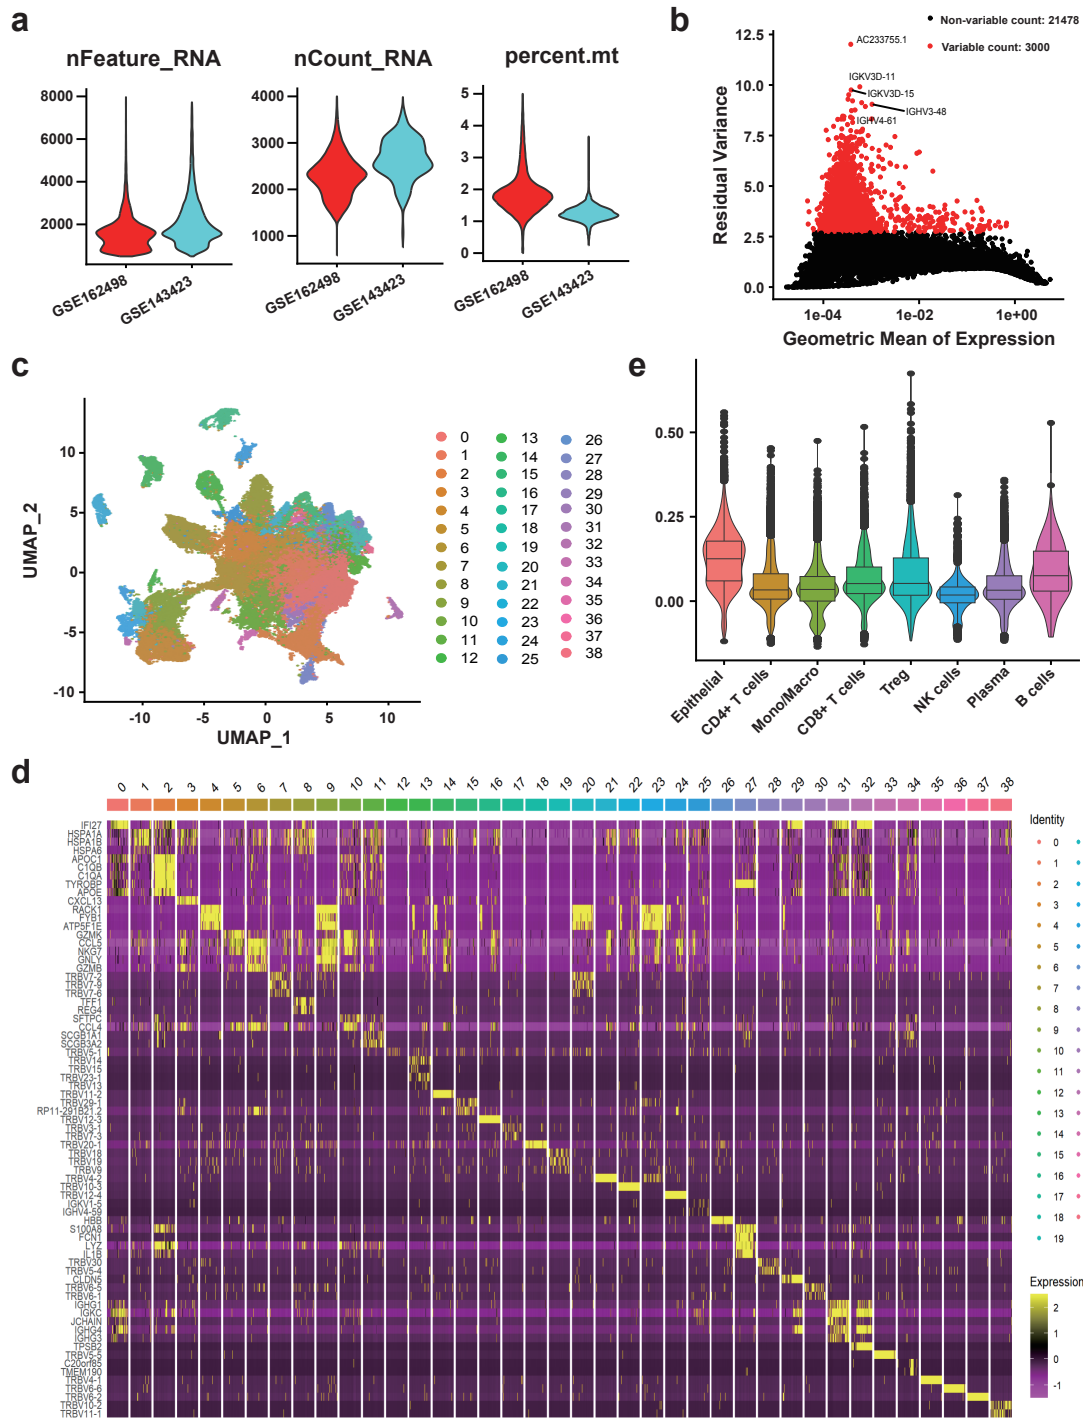

**Supplementary Figure 5: Quality control of single-cell RNA sequencing (scRNA) data from two LUAD single-cell datasets. (a)** The gene counts per cell (nFeature\_RNA), number of unique molecular identifiers (UMIs) per cell (nCount\_RNA), and percentage of mitochondrial genes per cell (percent.mt) of the scRNA-seq data. **(b)** The variance plot showed 21478 genes in all cells, red dots represent the top 3000 highly variable

genes. (c) UMAP plots for the 38 clusters' identification of single cells in LUAD datasets. (d) The Heatmap depicting expressions of the top 5 marker genes among 28 detected cell clusters. (e) Violin-box plot shows the level of CDIScore in eight cell types.

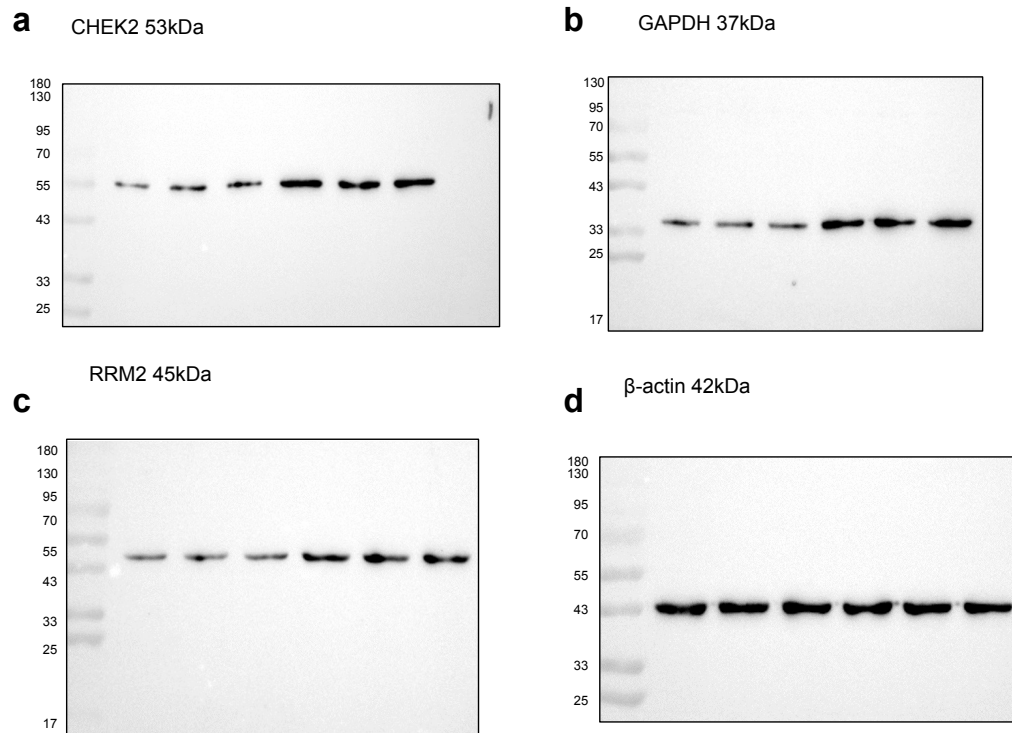

**Supplementary Figure 6:** Uncropped scans of the most important blots. (a) Uncropped scans of CHEK2. (b) Uncropped scans of GAPDH. (c) Uncropped scans of RRM2. (d) Uncropped scans of  $\beta$ -actin.

**Supplementary Table 1 the primer sequence of each medel gene**

| Gene    | Gene ID | primer sequence                                  |
|---------|---------|--------------------------------------------------|
| CHEK2   | 11200   | TCTCGGGAGTCGGATGTTGAG<br>CCTGAGTGGACACTGTCTCTAA  |
| KRT18   | 3875    | TCGCAAATACTGTGGACAATGC<br>GCAGTCGTGTGATATTGGTGT  |
| MMP1    | 4312    | GGGGCTTTGATGTACCCTAGC<br>TGTCACACGCTTTTGGGGTTT   |
| CHRNA5  | 1138    | AAAGATGGGTTCGTCCTGTGG<br>CAAACAAAACGATGTCTGGTGTC |
| TMPRSS4 | 56649   | ATGCGGAACTCAAGTGGGC<br>CTGTTTGTCTACTGGATGCT      |
| ITGB4   | 3691    | GCTTCACACCTATTTCCCTGTC<br>GACCCAGTCCTCGTCTTCTG   |
| CD79a   | 973     | CAAGAACCGAATCATCACAGCC<br>TCTGCCATCGTTTCCTGAACA  |
| CTLA4   | 1493    | GCCCTGCACTCTCCTGTTTTT<br>GGTTGCCGCACAGACTTCA     |
| RRM2    | 6241    | GTGGAGCGATTTAGCCAAGAA<br>CACAAGGCATCGTTTCAATGG   |
| GAPDH   | 2597    | CTGGGCTACACTGAGCACC<br>AAGTGGTCGTTGAGGGCAATG     |
| ACTB    | 60      | CATGTACGTTGCTATCCAGGC<br>CTCCTTAATGTCACGCACGAT   |





|         |          |          |                 |
|---------|----------|----------|-----------------|
| CUL4A   | GSK3A    | HSPA8    | LMO7            |
| CUL5    | GSK3B    | HYAL1    | CCT6A           |
| CX3CL1  | HAX1     | IDS      | APBA1           |
| CX3CR1  | HDAC6    | IDUA     | WFDC1           |
| CXCL12  | HERC1    | IGF2R    | CER1            |
| CYLD    | HGF      | IL13     | UBR4            |
| CYP1B1  | HIF1A    | IL13RA2  | DPP7            |
| DAB2IP  | HMGGB1   | IL4      | PTGES3L-AARSD1  |
| DAP     | HMOX1    | IL4R     | OR1G1           |
| DAP3    | HSP90AA1 | KIF1B    | PRKACA          |
| DAPK1   | HSPA8    | KIT      | FBXW5           |
| DAPK2   | HSPB1    | KXD1     | PHGDH           |
| DAPK3   | HSPB8    | LAMP1    | DDIT4           |
| DAPL1   | HTR2B    | LAMP2    | KLHL11          |
| DAXX    | HTRA2    | LAMP3    | HNRNP1A1        |
| DBH     | HTT      | LAMTOR1  | SGCD            |
| DCC     | HUWE1    | LAPTM4A  | LRBA            |
| DDIAS   | IFI16    | LAPTM4B  | AP3B1           |
| DDIT3   | IFNG     | LAPTM5   | FAM86B1         |
| DDIT4   | IKBK     | LAT      | KCTD19          |
| DDX3X   | IL10     | LAT2     | EXOC7           |
| DDX47   | IL10RA   | LGALS9   | IFNA7           |
| DDX5    | IL4      | LGMN     | MSH6            |
| DEDD    | IRGM     | LIPA     | SIRT7           |
| DEDD2   | ITPR1    | LRRK2    | MGAT2           |
| DELE1   | KAT5     | LYN      | FAM126A         |
| DEPTOR  | KAT8     | M6PR     | XPOT            |
| DIABLO  | KDM4A    | MAN2B1   | HIST1H3A        |
| DIDO1   | KDR      | MANBA    | CASP14          |
| DNAJA1  | KEAP1    | MAP1LC3A | C16orf96        |
| DNAJC10 | KIF25    | MAP6     | TNFAlP2         |
| DNM1L   | KLHL22   | MCOLN1   | LIPH            |
| DPF2    | KLHL3    | MFSD8    | LTB             |
| DYRK2   | LACRT    | MILR1    | ALDH3A2         |
| E2F1    | LAMP1    | MRGPRX2  | HEXDC           |
| E2F2    | LAMP2    | MT3      | SIAE            |
| EDA2R   | LAMP3    | MYH9     | SEMA3D          |
| EIF2AK3 | LAMTOR1  | NAGA     | RNPS1           |
| ELL3    | LAMTOR2  | NAGLU    | NEK11           |
| ENO1    | LAMTOR3  | NAGPA    | SLC1A6          |
| EP300   | LAMTOR4  | NAPSA    | NPC1            |
| EPHA2   | LAMTOR5  | NCOA4    | PROL1           |
| EPO     | LARP1    | NDEL1    | SDE2            |
| ERBB3   | LEP      | NEDD4    | IL1RAP          |
| ERCC6   | LEPR     | NEU1     | CENPH           |
| ERN1    | LGALS8   | NPC1     | ZNF296          |
| ERN2    | LRRK2    | NPC2     | CCDC149         |
| ERO1A   | LRSAM1   | NR4A3    | TADA2A          |
| ERP29   | LZTS1    | PDPK1    | GDPD3           |
| EYA1    | MAP1LC3A | PIK3C3   | NPTN            |
| EYA2    | MAP1LC3B | PIK3CD   | FBXW11          |
| EYA3    | MAP1LC3C | PIK3CG   | TMEM101         |
| EYA4    | MAP3K7   | PIP4K2A  | SUPT16H         |
| FADD    | MAPK15   | PIP4K2B  | LAMTOR1         |
| FAF1    | MAPK3    | PIP4P1   | CYLC1           |
| FAIM    | MAPK8    | PLA2G15  | ARL3            |
| FAIM2   | MAPT     | PLA2G3   | FBXW12          |
| FAM162A | MCL1     | PLEKHM1  | CCDC108         |
| FAS     | MEFV     | PLEKHM2  | ITPA            |
| FASLG   | MET      | PPT1     | TOMM6           |
| FASTK   | MFN2     | PPT2     | SLC17A3         |
| FBH1    | MFSD8    | PSAP     | H3F3B           |
| FBXW7   | MID2     | PSAPL1   | HACL1           |
| FEM1B   | MIR199A1 | PTGDR    | ATP7B           |
| FGA     | MIRLET7B | PTGDS    | PKIB            |
| FGB     | MLST8    | RAB34    | KLHL10          |
| FGF10   | MT3      | RAB3A    | SS18            |
| FGFR1   | MTCL1    | RAB7A    | ZNF812          |
| FGFR3   | MTDH     | RAC2     | DIS3L2          |
| FGG     | MTM1     | RUBCNL   | TRPT1           |
| FHIT    | MTMR3    | S100A13  | PGRMC2          |
| FIGNL1  | MTMR4    | SCAR82   | CDYL            |
| FIS1    | MTMR8    | SGSH     | OR8B12          |
| FNIP2   | MTMR9    | SLC11A1  | ENGASE          |
| FXN     | MTOR     | SLC11A2  | RANBP3          |
| FYN     | NCOA4    | SLC17A5  | SLC39A5         |
| FZD9    | NEDD4    | SMPD1    | NOL8            |
| G0S2    | NLRP6    | SNAP23   | ADAM22          |
| GABARAP | NOD1     | SNAPIN   | SLC52A2         |
| GATA1   | NOD2     | SNX16    | ZNF280D         |
| GATA4   | NPC1     | SNX4     | HIST1H3E        |
| GCLM    | NPRL2    | SORL1    | PRKCSH          |
| GDNF    | NRBP2    | SORT1    | PFDN2           |
| GFRAL   | NUPR1    | SPAG9    | SLC7A6OS        |
| GGCT    | OPTN     | SPHK2    | POMZP3          |
| GHITM   | ORMDL3   | SQSTM1   | PRMT3           |
| GNAI2   | OSBPL7   | STXBP1   | DHODH           |
| GNAI3   | PAFAH1B2 | STXB2    | CEP85L          |
| GPER1   | PARK7    | SUMF1    | C12orf68        |
| GPX1    | PHB2     | SYK      | NSMF            |
| GRINA   | PHF23    | SYTL4    | TIMM17B         |
| GSDME   | PIK3C2A  | TCIRG1   | DDX52           |
| GSK3A   | PIK3C3   | TFEB     | BAI3            |
| GSK3B   | PIK3CA   | TMEM106B | KLHL28          |
| GSKIP   | PIK3CB   | TPP1     | BACH2           |
| GSTP1   | PIK3R2   | UNC13D   | PRKAG2          |
| GZMB    | PIM2     | VAMP7    | RPS11           |
| HDAC1   | PINK1    | VAMP8    | MAP1LC3B        |
| HERPUD1 | PIP4K2A  | VPS33A   | SLC8A3          |
| HGF     | PIP4K2B  | VPS33B   | SLFN14          |
| HIC1    | PIP4K2C  | VPS4A    | SECISBP2L       |
| HIF1A   | PJVK     | WASH3P   | NECAB2          |
| HINT1   | PLEKHF1  | ZFYVE16  | ATP6AP1         |
| HIP1    | PLK2     |          | FOSB            |
| HIP1R   | PLK3     |          | LACC1           |
| HIPK1   | POLDIP2  |          | LMOD1           |
| HIPK2   | PRKAA1   |          | ZNF221          |
| HMGGB1  | PRKAA2   |          | SLC35E3         |
| HMOX1   | PRKAB1   |          | ZNF543          |
| HNRNP1K | PRKAB2   |          | CBY3            |
| HRAS    | PRKACA   |          | CHRNA5          |
| HRK     | PRKAG1   |          | M6PR            |
| HSPA1A  | PRKAG2   |          | FANCG           |
| HSPA1B  | PRKAG3   |          | TRIB1           |
| HSPB1   | PRKD1    |          | ABCC12          |
| HTRA2   | PRKN     |          | SPCS2           |
| HTT     | PSAP     |          | TMEM177         |
| HYAL2   | PTPN22   |          | ACTR1A          |
| HYOU1   | PYCARD   |          | ANKHD1-EIF4EBP3 |

|          |          |            |
|----------|----------|------------|
| ICAM1    | QSOX1    | ELMO3      |
| IFI16    | RAB39B   | TCTN3      |
| IFI27    | RAB3GAP1 | APEX2      |
| IFI27L1  | RAB3GAP2 | TOMM22     |
| IFI27L2  | RAB7A    | ZNF446     |
| IFI6     | RAB8A    | ANTXR1     |
| IFNB1    | RALB     | B4GALT3    |
| IFNG     | RASIP1   | DCAF13     |
| IGF1     | RB1CC1   | JUN        |
| IKBKE    | RETREG1  | TXNDC9     |
| IL12A    | RETREG3  | PEX16      |
| IL19     | RHEB     | UBAC2      |
| IL1A     | RIPK2    | HCN1       |
| IL1B     | RMC1     | ASB10      |
| IL2      | RNF152   | ST6GALNAC3 |
| IL20RA   | RNF41    | FAM124A    |
| IL33     | RNF5     | ZMAT1      |
| IL4      | ROCK1    | ERVV-2     |
| IL6R     | RPTOR    | OBP2A      |
| IL7      | RRAGA    | VBP1       |
| INCA1    | RRAGB    | TTL2       |
| ING2     | RRAGC    | CENPL      |
| ING5     | RRAGD    | CCDC70     |
| INHBA    | RUBCN    | TNMD       |
| INHBB    | RUFY4    | EBP        |
| INS      | SCFD1    | LYPD3      |
| ITGA6    | SCOC     | GA3        |
| ITGAM    | SEC22B   | ASB9       |
| ITGAV    | SESN1    | NOP16      |
| ITM2C    | SESN2    | OR10AD1    |
| ITPR1    | SESN3    | ANTXR2     |
| ITPRIP   | SH3BP4   | HNRNPR     |
| IVNS1ABP | SH3GLB1  | AFAP1      |
| JAK2     | SIRT1    | EIF6       |
| JMY      | SIRT2    | TAS2R41    |
| JUN      | SLC38A9  | MYPN       |
| KDM1A    | SMCR8    | HIST1H4A   |
| KITLG    | SMG1     | LRRK1      |
| KRT18    | SNCA     | GEMIN2     |
| KRT8     | SNRNP70  | GRN        |
| LCK      | SNX32    | SAT2       |
| LGALS12  | SNX5     | LRRC7      |
| LGALS3   | SNX6     | GDPD1      |
| LRRK2    | SOGA1    | CYB5B      |
| LTBR     | SOGA3    | URB2       |
| LY96     | SPTLC1   | ACADVL     |
| MADD     | SPTLC2   | PKD2       |
| MAEL     | SQSTM1   | UQCRB      |
| MAGEA3   | SREBF1   | NGLY1      |
| MAP2K5   | SREBF2   | CISD1      |
| MAP3K5   | STAT3    | NAPB       |
| MAPK7    | STBD1    | CCL7       |
| MAPK8    | STING1   | COL4A3BP   |
| MAPK8IP1 | STK11    | CYHR1      |
| MAPK8IP2 | STUB1    | KIAA0232   |
| MAPK9    | SUPT5H   | PIGK       |
| MARCF7   | SVIP     | TMPRSS4    |
| MAZ      | SYNPO2   | RBMX2      |
| MCL1     | TAB2     | TMEM168    |
| MDM2     | TAB3     | WDR7       |
| MELK     | TBC1D14  | MRPL4      |
| MFF      | TBC1D25  | DAZAP1     |
| MIF      | TBK1     | R3HCC1L    |
| MIR132   | TEX264   | C12orf66   |
| MIR15A   | TFEB     | PELI2      |
| MIR16- 1 | TICAM1   | CYB561D1   |
| MIR17    | TIGAR    | LEFTY1     |
| MIR198   | TLK2     | PRKG2      |
| MIR21    | TMEM150A | GBAS       |
| MIR210   | TMEM150B | KIAA1731   |
| MIR221   | TMEM150C | MAP2       |
| MIR222   | TMEM39A  | YPEL1      |
| MIR26B   | TMEM39B  | WDR87      |
| MIR27B   | TMEM59   | SLC25A38   |
| MIR449A  | TOMM7    | NXT1       |
| MKNK2    | TP53     | GABPB2     |
| MLH1     | TP53INP1 | OSCP1      |
| MLLT11   | TP53INP2 | RFC2       |
| MMP9     | TPCN1    | TNC        |
| MNT      | TPCN2    | BTG2       |
| MOAP1    | TREM2    | TCF4       |
| MPV17L   | TRIB3    | SCAMP4     |
| MSH2     | TRIM13   | STAM2      |
| MSH6     | TRIM14   | CCDC61     |
| MSX1     | TRIM21   | ZNF259     |
| MUC1     | TRIM22   | FOXP4      |
| MUL1     | TRIM27   | WNT9A      |
| MYBBP1A  | TRIM34   | MYRIP      |
| NACC2    | TRIM38   | KIF18A     |
| NANOS3   | TRIM5    | CDK18      |
| NBN      | TRIM6    | SLC46A3    |
| NCK1     | TRIM65   | TLE4       |
| NCK2     | TRIM68   | HEXB       |
| NDUFA13  | TRIM8    | COG5       |
| NDUFS3   | TRIML1   | NRBP1      |
| NFATC4   | TRIML2   | FAM89B     |
| NFE2L2   | TSC1     | PRRG1      |
| NGF      | TSC2     | ASB6       |
| NGFR     | TSPO     | RPL36A     |
| NKX3- 1  | UBA5     | INHBC      |
| NLE1     | UBQLN1   | RRP1       |
| NME5     | UBQLN2   | RAVER1     |
| NMT1     | UBQLN4   | PCLO       |
| NOC2L    | UCHL1    | KRT72      |
| NOG      | UFC1     | UCHL1      |
| NOL3     | UFL1     | DIS3L      |
| NONO     | UFM1     | ZNF182     |
| NOS3     | ULK1     | ZBTB8A     |
| NOX1     | USP10    | KIAA1551   |
| NR4A2    | USP13    | CHD1L      |
| NUPR1    | USP30    | MSX1       |
| OPA1     | USP33    | CEPT1      |
| P2RX4    | USP36    | RTF1       |
| P2RX7    | UVRAG    | CNIH4      |
| P4HB     | VDAC1    | IFI44      |
| PAK2     | VPS13C   | IL2        |
| PAK5     | VPS13D   | RNF14      |
| PARK7    | VPS26A   | SLC6A1     |
| PARP1    | VPS26B   | ZFP30      |

PARP2  
PAWR  
PCGF2  
PDCD10  
PDCD5  
PDCD6  
PDIA3  
PDK1  
PDK2  
PDPK1  
PDX1  
PEA15  
PEL3  
PERP  
PF4  
PHIP  
PHLDA3  
PIAS4  
PID1  
PIH1D1  
PIK3R1  
PINK1  
PLAGL2  
PLAUR  
PLEKHF1  
PLSCR3  
PMAIP1  
PML  
POLB  
POU4F1  
POU4F2  
PPARD  
PPA  
PPIA  
PPIF  
PPM1F  
PPP1CA  
PPP1R13B  
PPP1R15A  
PPP2R1B  
PPP3CC  
PPP3R1  
PRDX2  
PRELID1  
PRKCA  
PRKCD  
PRKDC  
PRKN  
PRKRA  
PRODH  
PSEN1  
PSMD10  
PSME3  
PTEN  
PTGIS  
PTH  
PTPMT1  
PTPN1  
PTPN2  
PTPRC  
PTTG1IP  
PYCARD  
QARS1  
RACK1  
RAF1  
RB1  
RB1CC1  
RBCK1  
RELA  
RET  
RFFL  
RHOT1  
RHOT2  
RIPK1  
RIPK3  
RNF183  
RNF186  
RNF34  
RNF41  
RPL11  
RPL26  
RPS27L  
RPS3  
RPS6KB1  
RPS7  
RRP8  
RTKN2  
RTL10  
S100A8  
S100A9  
SCG2  
SCN2A  
SCRT2  
SELENOK  
SELENOS  
SENP1  
SEPTIN4  
SERINC3  
SERPINE1  
SFN  
SFPQ  
SFRP1  
SFRP2  
SGMS1  
SGPL1  
SGPP1  
SH3RF1  
SHH  
SHISA5  
SIAH1  
SIAH2  
SIRT1  
SIVA1  
SKIL  
SLC25A5  
SLC35F6  
SLC9A3R1  
SMAD3  
SNAI1  
SNAI2

VPS35  
WAC  
WASHC1  
WDFY3  
WDR24  
WDR41  
WDR6  
WDR81  
WIPI2  
ZC3H12A  
ZKSCAN3  
ZMPSTE24

ZDHHHC23  
EID1  
F7  
CST7  
SPATA21  
ZNF280A  
GTF2F1  
IDH2  
RNF32  
CDC25B  
CTIF  
TEAD2  
PROX1  
SRSF6  
LAX1  
MED16  
STAT3  
PDZK1  
LYPD4  
CES3  
AMACR  
PDAP1  
CCM2  
PEX5L  
FAM210A  
PAPSS1  
SNX12  
C20orf202  
MICU2  
LSM5  
PF4  
ZNF506  
RD3L  
HOXB13  
CCDC158  
FAM166A  
C12orf61  
DYNC1H1  
UTS2B  
TM2D2  
CAPSL  
TNN  
UBAC1  
FABP12  
GTF2E2  
EML6  
GP9  
TCF20  
NOB1  
TMED4  
TRIM47  
GNG12  
C15orf60  
CYLC2  
ATPIF1  
EXT1  
YARS  
NMNAT2  
GARNL3  
DEFB108B  
KRCC1  
SERPINE3  
PTGR2  
SHISA6  
FEM1C  
TRA2A  
MDP1  
SNRPB2  
TTC17  
PKIA  
AP1M1  
DHRS11  
IFI27L2  
CRCP  
HIST1H2BM  
CLDN18  
AMPD1  
OR51I2  
CDK6  
AFF1  
ITGB8  
RPS21  
MCPH1  
AP1G1  
DDN  
ACOT2  
HIST2H2AC  
LRRC32  
HS6ST2  
TFAP2C  
RBMS2  
LAPTM5  
TSACC  
FBXL20  
ZNF317  
TWIST2  
TNXB  
PNN  
ZRANB1  
EIF4B  
RBM34  
HCAR3  
TMPRSS3  
TMX2  
SERPINB1  
FAM161A  
EFCC1  
OR1A1  
CENPW  
ZNF697  
RAB9B  
SH2D2A  
TMEM88  
TNFRSF17  
UBP1  
CORO1C  
C20orf195  
DIXDC1  
IGSF9

SNW1  
SOD1  
SOD2  
SORT1  
SP100  
SRC  
SRPX  
SST  
SSTR3  
ST20  
STK11  
STK24  
STK25  
STK3  
STK4  
STRADB  
STX4  
STYXL1  
SYVN1  
TAF9  
TAF9B  
TCF7L2  
TERT  
TFDP1  
TFDP2  
TFPT  
TGFB1  
TGFB2  
TGFBRI1  
THBS1  
TICAM1  
TICAM2  
TIMM50  
TIMP3  
TLR3  
TLR4  
TM2D1  
TMBIM1  
TMBIM6  
TMC8  
TMEM102  
TMEM109  
TMEM117  
TMEM14A  
TMEM161A  
TNF  
TNFAIP3  
TNFRSF10A  
TNFRSF10B  
TNFRSF10C  
TNFRSF12A  
TNFRSF1A  
TNFRSF1B  
TNFRSF25  
TNFSF10  
TNFSF12  
TOPORS  
TP53  
TP53BP2  
TP63  
TP73  
TPD52L1  
TPT1  
TRADD  
TRAF1  
TRAF2  
TRAF7  
TRAP1  
TRIAP1  
TRIB3  
TRIM32  
TRIM39  
TXNDC12  
TYROBP  
UACA  
UBB  
UBE2K  
UBE4B  
UBQLN1  
UMOD  
UNC5B  
URI1  
USP28  
USP47  
VDAC2  
VNN1  
WDR35  
WNT4  
WWOX  
XBP1  
YAP1  
YBX3  
YWHAB  
YWHAE  
YWHAG  
YWHAH  
YWHAQ  
YWHAZ  
ZC3HC1  
ZDHHC3  
ZMYND11  
ZNF205  
ZNF385A  
ZNF385B  
ZNF622  
ZSWIM2

AQR  
CACFD1  
IMPG2  
PMVK  
ZFP90  
PGLYRP4  
AKAP14  
KLF3  
PRELID1  
VPS18  
SQLE  
PSME1  
C20orf112  
KATNB1  
C8orf37  
MPZ  
CYP2R1  
C7orf55  
PEX14  
BCL2L2  
C7orf50  
RRP12  
ZNF160  
TRHR  
NCAPH  
ZC3H7B  
WDR70  
RSPH3  
HSPB7  
METTL13  
C21orf33  
DPYS  
EIF4EBP3  
WBSCR28  
ABCG1  
TSR1  
FBXL2  
SMAD4  
KRT78  
AKT2  
MXD3  
ADAM15  
C1orf74  
ATXN1L  
SLC29A3  
LHFP13  
CA11  
DEGS1  
WFDC3  
ZNF606  
ARHGEP7  
GPR125  
APIP  
JDP2  
ARHGAP12  
MED12  
MUC22  
NUP133  
TMCO5A  
MAPK8IP1  
SNRK  
GNAT2  
ATP5L2  
NDST1  
TMED1  
KRTAP10-9  
SMIM9  
TP11  
GINS1  
ANKRD39  
TYROBP  
KDR  
USMG5  
FAM219B  
SOAT2  
P4HA3  
ZNF181  
TOMM5  
PLSCR4  
ZNF678  
GABRG3  
TBC1D13  
NUP43  
COL4A3  
STMN4  
SERPINA4  
IWS1  
WFDC8  
BCLAF1  
ATG13  
MLLT10  
DTNB  
CIB4  
SEMA5B  
NFATC4  
ITGB4  
C19orf45  
ATRX  
PNPLA1  
RP11-389E17.1  
STMN3  
CD79A  
TRIM69  
DPPA5  
GALNTL6  
RAB32  
SRRM5  
RPP14  
GATA5  
SPHKAP  
EPM2AIP1  
RAB4A  
EGFL6  
CGREF1  
C3orf14  
RPLP0  
GDI1  
RNF220  
ZNF865

POLR2C  
FDXACB1  
KRTAP4-3  
TBX18  
ZNF180  
JKAMP  
LAIR1  
SPTSSA  
MYH14  
DET1  
EBI3  
RNF26  
CTBP1  
SLAIN2  
PLEKHA5  
TNPO3  
STK16  
DIEXF  
C7orf62  
45261  
KRT222  
HLCS  
TGIF1  
NECAP1  
SYT5  
FEM1A  
FGF3  
ZNF766  
NRF1  
DIP2B  
TXN  
44996  
ANKRD16  
DCN  
C9orf117  
ZDHH4  
UNC50  
PIFO  
NTN1  
BCAS3  
IL6ST  
IGF2BP2  
PRKRIR  
REG3A  
PEX12  
POLR1B  
RNASE2  
FAM155B  
DDI1  
PIGL  
RAD23B  
GPR88  
MYOZ3  
SYNE2  
CCL8  
PIK3IP1  
ZCCHC4  
ELL3  
C2orf47  
PCYOX1  
SARM1  
ATP6V1A  
ZNF749  
ZNF449  
ZEB1  
SAV1  
NKTR  
TMPRSS11D  
RNASE13  
FAM150A  
PIGW  
OCA2  
SFI1  
GLO1  
PCDHGA5  
ZNF565  
PEX6  
GPC1  
DHRS13  
ART1  
GRHPR  
SDR42E1  
DNMT1  
LTA  
EXOC1  
RPS12  
TAL2  
CST9L  
TAPT1  
KLF1  
GRAMD1A  
HLA-B  
NAV1  
C16orf92  
AFTPH  
FAM83E  
CLIP2  
Cxorf57  
FUBP1  
UBE2E1  
AK5  
ZNF653  
TNRC6B  
RAB37  
OR52N1  
SEC14L6  
ZNF23  
SULF1  
C7orf41  
STK17A  
TARM1  
RAB2A  
CHST4  
MAT2A  
SLC35G2  
UCMA  
AFF2  
TAX1BP3  
COG2

PIK3CD  
NME2  
HIST1H2AB  
TAGLN  
MIP  
SCRN1  
ATAD3A  
DDX1  
C15orf53  
KRTAP10-4  
MMD2  
MTHFS  
ARSD  
DCLRE1C  
HSP90A81  
ITGAE  
PWP2  
HIST1H2AD  
LRP5  
USP18  
RETNLB  
CNTRL  
HOXD9  
CNTNAP1  
COPE  
PSD3  
ZNF10  
OSGIN2  
EBLN1  
TMEM44  
DOK4  
TRAF1  
CENPO  
SESN1  
TAF9  
RBBP7  
ZNF419  
DHX15  
GML  
CD97  
RFWD3  
RER1  
TNFSF10  
CORO2B  
ICOSLG  
MAP3K1  
RGS6  
ZNF407  
CIRBP  
SMYD2  
FOLR3  
C17orf85  
STPG2  
TSSC4  
FZD1  
MTMR4  
AGBL3  
GTF3C3  
TTLL11  
UBXN2A  
TGFB2  
CLIC5  
ACSM5  
OSCAR  
TMEM57  
MKI67IP  
KIAA0087  
CCDC30  
ECI1  
TM9SF4  
INF2  
CDRT1  
HM13  
RAP1B  
GSTA5  
KATNAL2  
MAS1L  
CACNA1C  
CDT1  
HDGFL1  
GDAP2  
SYCP1  
STK3  
BPI  
GPR15  
C7orf57  
FAM217A  
CDC42BPA  
APOL4  
TBC1D14  
TTF2  
LEPROTL1  
HS3ST3A1  
EDF1  
WDR20  
TMEM41A  
FAM120B  
IQCK  
CENPI  
PAK1IP1  
CWC22  
AEN  
LSM7  
GSK3B  
ADAMTSL3  
STK32C  
POLE2  
ESPNL  
LILRA2  
IFT88  
KBTBD4  
PLEKHO1  
MBOAT1  
MSANTD2  
VCP  
BFAR  
NFIC  
GAR1  
ENDOV

CCDC144NL  
UBE3C  
PRPF3  
OR9Q2  
IFI35  
ELF2  
CCDC42B  
CCDC176  
ZBTB44  
GRPEL1  
PDC  
ANKLE2  
IGF2R  
NRARP  
ATP1A3  
CSNK2B  
NSF  
PSMB6  
MS4A13  
PARD3  
SND1  
DND1  
WB5P5  
OR6C74  
KAL1  
MTPN  
ADAM17  
SFN  
POFUT1  
MPND  
MAGED1  
NKRFL  
ATP5L  
KCNMB2  
CERS3  
CTLA4  
ZFP62  
ZNF155  
GTF2H1  
SBF2  
NT5M  
CCNE1  
FRG1  
AQP6  
ZBED4  
GRB2  
SERPINA3  
ADM  
AMZ2  
CD200R1  
C8B  
IQGAP2  
OR2M5  
TTC4  
TMEM102  
INPP4A  
RPS3A  
RRM2  
LPCAT3  
WIBG  
ANGPTL6  
HIGD2B  
PRKD1  
FAM186B  
PROSC  
EMILIN3  
TMEM219  
MRPS36  
TCEA3  
KCNJ6  
SNN



**Supplementary Table 3 the information of 52 PCD genes in LUAD**

| gene_name | log2FoldChange | lfcSE      | stat       | pvalue     | padj       |
|-----------|----------------|------------|------------|------------|------------|
| BIK       | 2.00106575     | 0.16494956 | 12.1313796 | 7.2026E-34 | 1.8063E-32 |
| BRCA1     | 1.47609135     | 0.1298307  | 11.3693554 | 5.9425E-30 | 1.1945E-28 |
| CHEK2     | 1.47900828     | 0.11448219 | 12.9191119 | 3.5117E-38 | 1.1144E-36 |
| E2F1      | 1.45776262     | 0.14270982 | 10.2148726 | 1.701E-24  | 2.4179E-23 |
| E2F2      | 2.33705661     | 0.14668775 | 15.9321871 | 3.7887E-57 | 3.1126E-55 |
| ENO1      | 1.18092634     | 0.0969699  | 12.1782778 | 4.0576E-34 | 1.0333E-32 |
| GGCT      | 1.70031974     | 0.10841757 | 15.683065  | 1.9749E-55 | 1.5002E-53 |
| ITM2C     | 1.19768671     | 0.11930083 | 10.0392153 | 1.0249E-23 | 1.3857E-22 |
| KRT18     | 1.1940012      | 0.13106233 | 9.11017848 | 8.2247E-20 | 8.3628E-19 |
| KRT8      | 1.27035247     | 0.13196229 | 9.62663268 | 6.1719E-22 | 7.3722E-21 |
| MELK      | 3.61234179     | 0.17091169 | 21.1357206 | 3.734E-99  | 2.2388E-96 |
| MLLT11    | 2.11705228     | 0.23467274 | 9.02129602 | 1.8588E-19 | 1.8361E-18 |
| MMP9      | 1.99249621     | 0.20775452 | 9.59062751 | 8.7551E-22 | 1.0344E-20 |
| PDK1      | 1.70997329     | 0.11719393 | 14.5909714 | 3.206E-48  | 1.7387E-46 |
| PMAIP1    | 1.64251139     | 0.17565899 | 9.35056828 | 8.7178E-21 | 9.5872E-20 |
| PPIF      | 1.07564269     | 0.09290903 | 11.5773752 | 5.3664E-31 | 1.1462E-29 |
| RNF186    | 5.02292709     | 0.41123819 | 12.2141553 | 2.612E-34  | 6.7214E-33 |
| TNFRSF25  | 1.93587869     | 0.15253312 | 12.6915301 | 6.5886E-37 | 1.9749E-35 |
| GSDMB     | 1.72832504     | 0.14655752 | 11.7928102 | 4.2512E-32 | 9.6566E-31 |
| AIM2      | 2.81494372     | 0.23369958 | 12.0451382 | 2.0573E-33 | 5.0425E-32 |
| CP        | 3.48864787     | 0.2213479  | 15.7609259 | 5.778E-56  | 4.4813E-54 |
| FANCD2    | 1.54039002     | 0.09936755 | 15.501943  | 3.3656E-54 | 2.416E-52  |
| NQO1      | 3.03745694     | 0.21520204 | 14.1144432 | 3.0945E-45 | 1.4315E-43 |
| PROM2     | 2.60571419     | 0.15844105 | 16.4459542 | 8.9661E-61 | 8.2867E-59 |
| SLC7A11   | 3.06709536     | 0.23907255 | 12.8291405 | 1.1261E-37 | 3.5057E-36 |
| EEF1A2    | 6.35492205     | 0.32779182 | 19.3870672 | 9.9236E-84 | 2.5301E-81 |
| GAPDH     | 1.66196889     | 0.12132864 | 13.6980759 | 1.0425E-42 | 4.2006E-41 |
| TRAF5     | 1.3295247      | 0.11439563 | 11.6221629 | 3.1798E-31 | 6.8712E-30 |
| JAK3      | 1.10929702     | 0.11317958 | 9.80121167 | 1.1124E-22 | 1.406E-21  |
| CDKN2A    | 3.56299729     | 0.25871076 | 13.7721264 | 3.7501E-43 | 1.5592E-41 |
| MMP1      | 4.92906306     | 0.28866086 | 17.0756197 | 2.2542E-65 | 2.5446E-63 |
| BLK       | 1.24472433     | 0.22844929 | 5.44858051 | 5.0773E-08 | 1.8939E-07 |
| CXCL13    | 2.64081676     | 0.24769246 | 10.6616761 | 1.538E-26  | 2.4757E-25 |
| CHRNA5    | 3.63368293     | 0.23142646 | 15.7012424 | 1.4831E-55 | 1.1324E-53 |
| TMEM177   | 1.57023601     | 0.08119442 | 19.3392115 | 2.5129E-83 | 6.0917E-81 |
| DCAF13    | 1.33993053     | 0.09251592 | 14.4832426 | 1.5463E-47 | 8.0703E-46 |
| TMPRSS4   | 4.82128759     | 0.21660475 | 22.2584577 | 9.341E-110 | 1.219E-106 |
| TNC       | 1.55322054     | 0.21252172 | 7.30852613 | 2.7009E-13 | 1.6737E-12 |
| HS6ST2    | 3.68510737     | 0.19440693 | 18.9556377 | 3.9672E-80 | 8.341E-78  |
| IGSF9     | 3.23840393     | 0.16456882 | 19.6781138 | 3.3214E-86 | 9.823E-84  |
| GIN51     | 3.03731533     | 0.14949818 | 20.3167375 | 9.1456E-92 | 3.8276E-89 |
| ITGB4     | 1.67562812     | 0.1840665  | 9.10338454 | 8.756E-20  | 8.8827E-19 |
| CD79A     | 2.01179515     | 0.21099868 | 9.53463385 | 1.5042E-21 | 1.7423E-20 |
| CGREF1    | 4.2381889      | 0.24986005 | 16.9622513 | 1.5624E-64 | 1.7114E-62 |
| FAM155B   | 3.20183609     | 0.23512578 | 13.6175458 | 3.1498E-42 | 1.2366E-40 |
| SULF1     | 2.5454902      | 0.18184263 | 13.9983141 | 1.5961E-44 | 7.0738E-43 |

|       |            |            |            |            |            |
|-------|------------|------------|------------|------------|------------|
| CENPO | 1.10082225 | 0.10011498 | 10.9955796 | 4.0133E-28 | 7.1704E-27 |
| CDT1  | 2.75137083 | 0.15787966 | 17.4270126 | 5.1465E-68 | 6.5987E-66 |
| POLE2 | 2.34753114 | 0.13736272 | 17.0900159 | 1.7613E-65 | 2.0035E-63 |
| CTLA4 | 1.03014025 | 0.15961947 | 6.45372537 | 1.0913E-10 | 5.3574E-10 |
| CCNE1 | 3.28161507 | 0.1847596  | 17.76154   | 1.4033E-70 | 2.0411E-68 |
| RRM2  | 3.19820731 | 0.1608815  | 19.8792735 | 6.1518E-88 | 2.0067E-85 |

**Supplementary Table 4 the C-index of each model**

| TCGA          | TCGA       | GSE31210   | GSE50081   | GSE72094   |
|---------------|------------|------------|------------|------------|
| Lasso         | 0.66576869 | 0.54465146 | 0.62315975 | 0.61824201 |
| RSF+Lasso     | 0.66576869 | 0.54465146 | 0.62315975 | 0.61824201 |
| RSF+Enet[alp  | 0.665707   | 0.54127851 | 0.62546693 | 0.61923523 |
| Enet[alpha= 0 | 0.66593321 | 0.54336653 | 0.62294001 | 0.61916901 |
| RSF+Enet[alp  | 0.66593321 | 0.54336653 | 0.62294001 | 0.61916901 |
| Enet[alpha= 0 | 0.66568644 | 0.54433023 | 0.62294001 | 0.61837444 |
| RSF+Enet[alp  | 0.66568644 | 0.54433023 | 0.62294001 | 0.61837444 |
| CoxBoost+En   | 0.67496093 | 0.55187922 | 0.61590859 | 0.60857474 |
| Enet[alpha= 0 | 0.6662828  | 0.53822679 | 0.62656559 | 0.61940076 |
| RSF+Enet[alp  | 0.6662828  | 0.53822679 | 0.62656559 | 0.61940076 |
| CoxBoost+En   | 0.67498149 | 0.55155798 | 0.61579873 | 0.6079457  |
| CoxBoost+Ri   | 0.67962902 | 0.54850626 | 0.6145902  | 0.60741599 |
| CoxBoost      | 0.66617998 | 0.54481208 | 0.62272028 | 0.61595762 |
| Enet[alpha= 0 | 0.66387678 | 0.54240283 | 0.62294001 | 0.62029465 |
| CoxBoost+La   | 0.67919717 | 0.55316415 | 0.61019556 | 0.60632346 |
| Lasso+StepC   | 0.66626224 | 0.55701895 | 0.6197539  | 0.60562821 |
| CoxBoost+St   | 0.66626224 | 0.55701895 | 0.6197539  | 0.60562821 |
| RSF+Enet[alp  | 0.66679691 | 0.53356891 | 0.62997144 | 0.61691773 |
| CoxBoost+St   | 0.67014889 | 0.54914873 | 0.61228302 | 0.60533024 |
| Enet[alpha= 0 | 0.66095665 | 0.53292644 | 0.61711712 | 0.62393643 |
| GBM           | 0.77985934 | 0.58801799 | 0.53911228 | 0.52178447 |
| Lasso+StepC   | 0.66346549 | 0.56103437 | 0.61535926 | 0.58814766 |
| StepCox[both  | 0.66764004 | 0.54449085 | 0.61338167 | 0.59731833 |
| StepCox[both  | 0.66788681 | 0.54465146 | 0.61283235 | 0.59711968 |
| StepCox[both  | 0.65853007 | 0.54449085 | 0.61557899 | 0.60350935 |
| StepCox[back  | 0.65853007 | 0.54449085 | 0.61557899 | 0.60350935 |
| StepCox[back  | 0.6677223  | 0.54465146 | 0.61228302 | 0.59665618 |
| StepCox[back  | 0.66794851 | 0.54465146 | 0.61107449 | 0.59629201 |
| StepCox[both  | 0.66745496 | 0.54449085 | 0.61107449 | 0.5962589  |
| StepCox[back  | 0.66745496 | 0.54449085 | 0.61107449 | 0.5962589  |
| StepCox[back  | 0.66745496 | 0.54416961 | 0.61107449 | 0.59642443 |
| StepCox[both  | 0.66776343 | 0.54465146 | 0.60986596 | 0.59635822 |
| StepCox[both  | 0.66722876 | 0.54449085 | 0.61041529 | 0.59596093 |
| StepCox[both  | 0.66731101 | 0.54449085 | 0.61019556 | 0.59592783 |
| StepCox[both  | 0.66835979 | 0.54465146 | 0.60964623 | 0.59513326 |
| StepCox[both  | 0.66755779 | 0.54449085 | 0.60964623 | 0.59592783 |
| StepCox[back  | 0.66745496 | 0.54449085 | 0.60964623 | 0.59602715 |
| StepCox[back  | 0.66735214 | 0.54416961 | 0.60997583 | 0.59602715 |
| StepCox[back  | 0.66735214 | 0.54449085 | 0.6094265  | 0.59546433 |
| StepCox[back  | 0.6682981  | 0.54481208 | 0.60964623 | 0.59377587 |
| StepCox[back  | 0.66724932 | 0.54433023 | 0.60953637 | 0.59536501 |
| StepCox[both  | 0.66739327 | 0.54433023 | 0.60931663 | 0.59539811 |
| StepCox[back  | 0.66739327 | 0.54433023 | 0.60931663 | 0.59539811 |
| StepCox[back  | 0.66729045 | 0.54433023 | 0.60920677 | 0.59539811 |
| StepCox[both  | 0.66731101 | 0.54433023 | 0.60898704 | 0.59553054 |
| StepCox[back  | 0.66747553 | 0.54416961 | 0.60898704 | 0.59543122 |

|             |            |            |            |            |
|-------------|------------|------------|------------|------------|
| StepCox[bot | 0.66747553 | 0.54416961 | 0.60898704 | 0.59539811 |
| StepCox[bot | 0.66745496 | 0.54416961 | 0.60887717 | 0.59546433 |
| RSF+StepCc  | 0.66706424 | 0.54433023 | 0.60799824 | 0.5953319  |
| RSF+StepCc  | 0.66706424 | 0.54433023 | 0.60799824 | 0.5953319  |
| StepCox[bot | 0.66706424 | 0.54433023 | 0.60799824 | 0.5953319  |
| StepCox[bac | 0.66706424 | 0.54433023 | 0.60799824 | 0.5953319  |
| RSF+GBM     | 0.79587892 | 0.59139094 | 0.50043946 | 0.5223804  |
| RSF+Enet[al | 0.66087439 | 0.46980405 | 0.61810591 | 0.62403576 |
| CoxBoost+C  | 0.79044995 | 0.49365564 | 0.53883762 | 0.51014733 |
| StepCox[bot | 0.77535576 | 0.49365564 | 0.53845309 | 0.51082602 |
| StepCox[bac | 0.77031751 | 0.49365564 | 0.53845309 | 0.51046184 |
| Lasso+GBM   | 0.7963519  | 0.49365564 | 0.51054713 | 0.50554544 |
| SuperPC     | 0.57304434 | 0.48715066 | 0.57547792 | 0.62264526 |
| RSF+SuperF  | 0.61071811 | 0.48168969 | 0.57734564 | 0.54259229 |
| survivalSVM | 0.53539113 | 0.49469965 | 0.54372665 | 0.60440324 |
| RSF+surviva | 0.53539113 | 0.49469965 | 0.54372665 | 0.60440324 |
| StepCox[bac | 0.53495928 | 0.48939929 | 0.55603164 | 0.58652541 |
| CoxBoost+s  | 0.54217735 | 0.48747189 | 0.51087673 | 0.62214865 |
| Lasso+survi | 0.54217735 | 0.48747189 | 0.51087673 | 0.62214865 |
| StepCox[bot | 0.52033808 | 0.48988114 | 0.54207866 | 0.58854494 |
| StepCox[bac | 0.52033808 | 0.48988114 | 0.54207866 | 0.58854494 |
| CoxBoost+S  | 0.57964547 | 0.48297462 | 0.53900242 | 0.49084589 |
| Lasso+Supe  | 0.57964547 | 0.48297462 | 0.53900242 | 0.49084589 |
| StepCox[bot | 0.54700995 | 0.47767427 | 0.52208306 | 0.52418474 |

Supplementary Table 5 GSVA results of each cohort

GSVA enrichment HALLMARK functions between high and low-PCDscoregroup in TCGA-LUAD

| Tag                               | logFC      | AveExpr    | t          | P.Value    | adj.P.Val  | B          |
|-----------------------------------|------------|------------|------------|------------|------------|------------|
| G2M_CHECKPOINT                    | 0.42998304 | -0.0113618 | 12.6597597 | 4.34E-32   | 2.17E-30   | 61.9658964 |
| GLYCOLYSIS                        | 0.24251821 | -0.0075697 | 12.3299912 | 1.03E-30   | 2.57E-29   | 58.8253401 |
| MITOTIC_SPINDLE                   | 0.30093883 | -0.0047231 | 12.0151667 | 2.03E-29   | 3.38E-28   | 55.8687043 |
| E2F_TARGETS                       | 0.4334935  | -0.0149688 | 11.7240958 | 3.07E-28   | 3.84E-27   | 53.1729615 |
| MTORC1_SIGNALING                  | 0.30668872 | -0.0095757 | 11.3986298 | 6.15E-27   | 6.15E-26   | 50.2036044 |
| MYC_TARGETS_V1                    | 0.35919288 | -0.0116238 | 9.9626753  | 1.84E-21   | 1.53E-20   | 37.7234268 |
| MYC_TARGETS_V2                    | 0.35153665 | -0.0169624 | 9.73714142 | 1.21E-20   | 8.61E-20   | 35.8631201 |
| UNFOLDED_PROTEIN_RESPONSE         | 0.22773726 | -0.0064129 | 7.94971935 | 1.23E-14   | 7.72E-14   | 22.2122447 |
| BILE_ACID_METABOLISM              | -0.1239946 | -0.0011298 | -7.7473424 | 5.20E-14   | 2.89E-13   | 20.7985643 |
| PI3K_AKT_MTOR_SIGNALING           | 0.15120251 | -0.0073391 | 7.59457627 | 1.51E-13   | 7.55E-13   | 19.7504499 |
| HYPOXIA                           | 0.14897921 | -0.0033061 | 7.4873665  | 3.16E-13   | 1.44E-12   | 19.0247976 |
| DNA_REPAIR                        | 0.1951959  | -0.0067379 | 6.92268604 | 1.35E-11   | 5.64E-11   | 15.3408238 |
| KRAS_SIGNALING_DN                 | -0.1260078 | 0.01010012 | -6.4612133 | 2.45E-10   | 9.43E-10   | 12.5080213 |
| PROTEIN_SECRETION                 | 0.18100196 | -0.0087568 | 6.24340183 | 9.10E-10   | 3.25E-09   | 11.2283771 |
| ANDROGEN_RESPONSE                 | 0.11459792 | -0.0059022 | 5.39597773 | 1.05E-07   | 3.50E-07   | 6.61338642 |
| UV_RESPONSE_UP                    | 0.08345384 | -0.0055775 | 5.12888863 | 4.16E-07   | 1.30E-06   | 5.28243715 |
| REACTIVE_OXYGEN_SPECIES_PATHWAY   | 0.14434185 | -0.0117754 | 5.00779339 | 7.63E-07   | 2.24E-06   | 4.69903531 |
| CHOLESTEROL_HOMEOSTASIS           | 0.10623138 | -0.0105162 | 4.83578366 | 1.76E-06   | 4.90E-06   | 3.89207295 |
| ESTROGEN_RESPONSE_LATE            | 0.06875318 | -0.007343  | 4.81700295 | 1.93E-06   | 5.08E-06   | 3.80551937 |
| MYOGENESIS                        | -0.0948045 | 0.01335622 | -4.6605996 | 4.04E-06   | 9.81E-06   | 3.09667202 |
| APOPTOSIS                         | 0.09373766 | 0.00393648 | 4.65633405 | 4.12E-06   | 9.81E-06   | 3.07764014 |
| TGF_BETA_SIGNALING                | 0.11946048 | 0.00495005 | 4.35734017 | 1.60E-05   | 3.63E-05   | 1.78363209 |
| OXIDATIVE_PHOSPHORYLATION         | 0.13485073 | -0.0193127 | 3.65428447 | 0.00028493 | 0.00061941 | -0.9425714 |
| APICAL_JUNCTION                   | 0.07593965 | 0.00695298 | 3.6378114  | 0.00030328 | 0.00063183 | -1.0010349 |
| PANCREAS_BETA_CELLS               | -0.0939544 | 0.00324361 | -3.5080215 | 0.00049183 | 0.00098366 | -1.4528837 |
| SPERMATOGENESIS                   | 0.05428515 | -0.0057223 | 3.00166792 | 0.00281817 | 0.00541955 | -3.0653778 |
| ADIPOGENESIS                      | 0.06602383 | -0.0057969 | 2.88314184 | 0.00410549 | 0.00760276 | -3.4079259 |
| TNFA_SIGNALING_VIA_NFKB           | 0.08016855 | 0.00163177 | 2.81181799 | 0.00511819 | 0.00913962 | -3.607622  |
| ESTROGEN_RESPONSE_EARLY           | 0.04424839 | -0.0009256 | 2.75661871 | 0.00605192 | 0.01043243 | -3.7588438 |
| P53_PATHWAY                       | 0.04974804 | 0.00139366 | 2.74540434 | 0.00625946 | 0.01043243 | -3.7892108 |
| ALLOGRAFT_REJECTION               | -0.0848171 | 0.0087736  | -2.5106537 | 0.01236269 | 0.01993982 | -4.3972388 |
| COAGULATION                       | -0.0506896 | 0.00809967 | -2.3386001 | 0.01974601 | 0.03085314 | -4.8092199 |
| EPITHELIAL_MESENCHYMAL_TRANSITION | 0.07868264 | 0.00266501 | 2.18576903 | 0.02929182 | 0.04438154 | -5.1511681 |
| APICAL_SURFACE                    | 0.04443095 | 0.0070855  | 2.13203239 | 0.03348694 | 0.0492455  | -5.2660148 |
| KRAS_SIGNALING_UP                 | -0.0370139 | 0.01123759 | -1.5994111 | 0.11035575 | 0.15458011 | -6.251914  |
| ANGIOGENESIS                      | 0.04742117 | 0.01004451 | 1.59518433 | 0.11129768 | 0.15458011 | -6.2586256 |
| HEDGEHOG_SIGNALING                | -0.0398238 | 0.01279106 | -1.5514624 | 0.12141842 | 0.16407895 | -6.327018  |
| INTERFERON_ALPHA_RESPONSE         | 0.05717493 | 0.00368903 | 1.53022236 | 0.1265889  | 0.16656434 | -6.3595635 |
| NOTCH_SIGNALING                   | 0.03039098 | 0.00995452 | 1.36722344 | 0.17216455 | 0.22072379 | -6.5945156 |
| IL6_JAK_STAT3_SIGNALING           | -0.0388118 | 0.01547518 | -1.3143251 | 0.18933447 | 0.23666809 | -6.6651264 |
| FATTY_ACID_METABOLISM             | 0.02847593 | -0.0150587 | 1.26919339 | 0.20495772 | 0.24994844 | -6.7231825 |
| INFLAMMATORY_RESPONSE             | -0.0299335 | 0.01428739 | -1.0410861 | 0.29833461 | 0.35516025 | -6.9857468 |
| IL2_STAT5_SIGNALING               | -0.0179283 | 0.00960439 | -0.8588946 | 0.39080684 | 0.45442655 | -7.1583645 |
| UV_RESPONSE_DN                    | 0.01510063 | 0.00811982 | 0.61950097 | 0.53586625 | 0.60893892 | -7.3349738 |
| XENOBIOTIC_METABOLISM             | -0.0046306 | -0.0050399 | -0.2714782 | 0.7861344  | 0.87348267 | -7.4898098 |
| WNT_BETA_CATENIN_SIGNALING        | -0.0053808 | 0.01080693 | -0.244905  | 0.80662968 | 0.87677139 | -7.4966639 |
| HEME_METABOLISM                   | 0.00319401 | -0.0026309 | 0.19988756 | 0.84164912 | 0.8953714  | -7.5066659 |
| INTERFERON_GAMMA_RESPONSE         | 0.00392394 | 0.00991427 | 0.1146049  | 0.90880393 | 0.94272364 | -7.520064  |
| COMPLEMENT                        | 0.00225769 | 0.00858394 | 0.09560892 | 0.92386917 | 0.94272364 | -7.5220589 |
| PEROXISOME                        | 0.00036487 | -0.0055697 | 0.02029711 | 0.98381439 | 0.98381439 | -7.5264196 |

GSVA enrichment HALLMARK functions between high and low-PCDscoregroup in GSE50081

| Tag                        | logFC      | AveExpr    | t          | P.Value    | adj.P.Val  | B          |
|----------------------------|------------|------------|------------|------------|------------|------------|
| MYC_TARGETS_V2             | 0.40454067 | -0.0218388 | 10.1125869 | 1.82E-19   | 9.08E-18   | 33.5068961 |
| E2F_TARGETS                | 0.4542404  | -0.0324492 | 9.93925806 | 5.69E-19   | 1.42E-17   | 32.3768029 |
| G2M_CHECKPOINT             | 0.39131737 | -0.0223526 | 9.27730921 | 4.23E-17   | 7.05E-16   | 28.1196815 |
| DNA_REPAIR                 | 0.22437481 | -0.0034042 | 7.33850811 | 6.33E-12   | 7.91E-11   | 16.3789228 |
| GLYCOLYSIS                 | 0.18534653 | 0.00473505 | 7.1953282  | 1.45E-11   | 1.45E-10   | 15.5671874 |
| MTORC1_SIGNALING           | 0.26476318 | -0.0001034 | 6.96182188 | 5.47E-11   | 4.55E-10   | 14.2629756 |
| SPERMATOGENESIS            | 0.13705404 | -0.0060736 | 6.84779986 | 1.04E-10   | 7.41E-10   | 13.6352906 |
| MYC_TARGETS_V1             | 0.30548907 | -0.0126652 | 6.73285571 | 1.97E-10   | 1.23E-09   | 13.008826  |
| HYPOXIA                    | 0.16560044 | 0.0061039  | 6.09035592 | 6.23E-09   | 3.46E-08   | 9.63090015 |
| MITOTIC_SPINDLE            | 0.15126204 | -0.0060318 | 5.2671278  | 3.77E-07   | 1.89E-06   | 5.6434051  |
| UV_RESPONSE_UP             | 0.12084831 | 0.00347828 | 5.12768226 | 7.27E-07   | 3.30E-06   | 5.00969055 |
| WNT_BETA_CATENIN_SIGNALING | 0.12861425 | -0.0004052 | 4.95076589 | 1.64E-06   | 6.83E-06   | 4.22421595 |
| UNFOLDED_PROTEIN_RESPONSE  | 0.14989728 | 0.00489822 | 4.7716914  | 3.66E-06   | 1.41E-05   | 3.45081795 |
| COAGULATION                | -0.1177664 | 0.01808585 | -4.0717475 | 6.87E-05   | 0.00024544 | 0.64814748 |
| PI3K_AKT_MTOR_SIGNALING    | 0.09626966 | 0.00689624 | 3.74365221 | 0.00024101 | 0.00080338 | -0.5379462 |

|                                   |            |            |            |            |            |            |
|-----------------------------------|------------|------------|------------|------------|------------|------------|
| OXIDATIVE_PHOSPHORYLATION         | 0.15983546 | 0.00257858 | 3.70825231 | 0.00027465 | 0.00085827 | -0.6608261 |
| PANCREAS_BETA_CELLS               | -0.0908402 | 0.00379563 | -3.671425  | 0.00031431 | 0.00092445 | -0.7875907 |
| BILE_ACID_METABOLISM              | -0.0851669 | 0.00110505 | -3.5439368 | 0.00049747 | 0.00138185 | -1.217932  |
| HEME_METABOLISM                   | -0.0671888 | 0.0066789  | -3.3548526 | 0.00096076 | 0.00252832 | -1.8316055 |
| CHOLESTEROL_HOMEOSTASIS           | 0.09404753 | 0.00375391 | 3.06572281 | 0.00249165 | 0.00622912 | -2.7119347 |
| KRAS_SIGNALING_UP                 | -0.0942171 | 0.01565082 | -3.0135074 | 0.00293898 | 0.00699756 | -2.863299  |
| MYOGENESIS                        | -0.0770796 | 0.00837093 | -2.7257852 | 0.00702189 | 0.01595885 | -3.6546981 |
| ALLOGRAFT_REJECTION               | -0.1121135 | 0.00681413 | -2.5527552 | 0.01148268 | 0.02475192 | -4.0953148 |
| APICAL_SURFACE                    | 0.06964485 | 0.01044256 | 2.54043549 | 0.01188092 | 0.02475192 | -4.1256613 |
| REACTIVE_OXYGEN_SPECIES_PATHWAY   | 0.08625064 | 0.01095226 | 2.31909102 | 0.02146628 | 0.04293257 | -4.6474128 |
| UV_RESPONSE_DN                    | -0.0760233 | 0.01577033 | -2.13201   | 0.03430572 | 0.06597254 | -5.0533439 |
| ESTROGEN_RESPONSE_LATE            | 0.04586458 | 0.00316417 | 2.04852074 | 0.04190057 | 0.07759365 | -5.2240135 |
| COMPLEMENT                        | -0.0688953 | 0.01452027 | -1.8888201 | 0.06045753 | 0.10795988 | -5.5322725 |
| INTERFERON_GAMMA_RESPONSE         | -0.0769053 | 0.0093865  | -1.6105409 | 0.10895957 | 0.18786133 | -6.011679  |
| P53_PATHWAY                       | 0.04184566 | 0.00392074 | 1.48662591 | 0.13879081 | 0.23131802 | -6.2012956 |
| ADIPOGENESIS                      | 0.04480044 | 0.00963237 | 1.43334193 | 0.1534231  | 0.24745662 | -7.0235263 |
| FATTY_ACID_METABOLISM             | 0.0432274  | 0.01027545 | 1.30118142 | 0.19479071 | 0.30436048 | -6.4573306 |
| IL6_JAK_STAT3_SIGNALING           | -0.0465006 | 0.01290892 | -1.1488071 | 0.25209681 | 0.38196486 | -6.6426508 |
| APICAL_JUNCTION                   | 0.03059531 | 0.00864547 | 1.11210333 | 0.26751554 | 0.38253949 | -6.6838955 |
| INFLAMMATORY_RESPONSE             | -0.0434631 | 0.01356554 | -1.1114923 | 0.26777764 | 0.38253949 | -6.684571  |
| INTERFERON_ALPHA_RESPONSE         | -0.0520514 | 0.00513076 | -1.0077681 | 0.31486268 | 0.43730928 | -6.7939138 |
| IL2_STAT5_SIGNALING               | -0.0289072 | 0.01251047 | -0.9355302 | 0.35071669 | 0.47394148 | -6.8638088 |
| TNFA_SIGNALING_VIA_NFKB           | 0.03045472 | 0.00770569 | 0.744868   | 0.45728278 | 0.60168787 | -7.0235261 |
| TGF_BETA_SIGNALING                | -0.0269244 | 0.01479187 | -0.6749166 | 0.50055896 | 0.64174226 | -7.0730917 |
| EPITHELIAL_MESENCHYMAL_TRANSITION | 0.03122729 | 0.01094246 | 0.6319758  | 0.52817138 | 0.66021423 | -7.1011105 |
| PROTEIN_SECRETION                 | -0.0262293 | 0.01990055 | -0.5966939 | 0.55143049 | 0.66146549 | -7.1227598 |
| XENOBIOTIC_METABOLISM             | -0.0137783 | 0.01061572 | -0.5854544 | 0.55894519 | 0.66146549 | -7.1293963 |
| APOPTOSIS                         | 0.01588059 | 0.00974914 | 0.57073699 | 0.56886032 | 0.66146549 | -7.1378963 |
| KRAS_SIGNALING_DN                 | 0.012086   | 0.00258651 | 0.48211778 | 0.63028377 | 0.71623155 | -7.1845173 |
| PEROXISOME                        | -0.009759  | 0.00261412 | -0.3654055 | 0.71521999 | 0.79468888 | -7.2339684 |
| HEDGEHOG_SIGNALING                | -0.0103351 | 0.00843458 | -0.320666  | 0.7488201  | 0.79768747 | -7.2493188 |
| ANGIOGENESIS                      | 0.01404232 | 0.01350775 | 0.31933666 | 0.74982623 | 0.79768747 | -7.2497443 |
| ESTROGEN_RESPONSE_EARLY           | 0.00200161 | 0.00758029 | 0.08052791 | 0.93590317 | 0.97489913 | -7.2975159 |
| ANDROGEN_RESPONSE                 | 0.00133096 | 0.01443675 | 0.03999766 | 0.96813749 | 0.98743965 | -7.2999604 |
| NOTCH_SIGNALING                   | -0.0004665 | 0.00279287 | -0.0157637 | 0.98743965 | 0.98743965 | -7.3006366 |

GSVA enrichment HALLMARK functions between high and low-PCDscoregroup in GSE72094

| Tag                               | logFC      | AveExpr    | t          | P.Value    | adj.P.Val  | B          |
|-----------------------------------|------------|------------|------------|------------|------------|------------|
| GLYCOLYSIS                        | 0.21710328 | -0.0059096 | 14.3845921 | 7.93E-39   | 3.97E-37   | 77.3308448 |
| MYC_TARGETS_V2                    | 0.35724782 | -0.0181254 | 12.2438258 | 6.34E-30   | 1.58E-28   | 56.9627948 |
| G2M_CHECKPOINT                    | 0.30665288 | -0.0173738 | 11.6562407 | 1.34E-27   | 2.24E-26   | 51.6454177 |
| MYC_TARGETS_V1                    | 0.2684288  | -0.015591  | 11.5378618 | 3.89E-27   | 4.87E-26   | 50.590782  |
| E2F_TARGETS                       | 0.33545895 | -0.0226865 | 11.4986279 | 5.53E-27   | 5.53E-26   | 50.2425272 |
| MTORC1_SIGNALING                  | 0.20777102 | -0.006153  | 11.4602404 | 7.79E-27   | 6.49E-26   | 49.9024088 |
| DNA_REPAIR                        | 0.15891522 | -0.0110652 | 9.89802454 | 5.12E-21   | 3.66E-20   | 36.6282953 |
| MITOTIC_SPINDLE                   | 0.13127992 | -0.008993  | 8.60849483 | 1.27E-16   | 7.96E-16   | 26.624335  |
| UNFOLDED_PROTEIN_RESPONSE         | 0.13411516 | -0.0063133 | 7.0604341  | 6.38E-12   | 3.55E-11   | 15.9739545 |
| OXIDATIVE_PHOSPHORYLATION         | 0.14000901 | -0.0114242 | 6.25885245 | 9.10E-10   | 4.55E-09   | 11.1198978 |
| SPERMATOGENESIS                   | 0.08030376 | -0.0049354 | 5.94343803 | 5.62E-09   | 2.56E-08   | 9.34380679 |
| ESTROGEN_RESPONSE_LATE            | 0.06905733 | -0.0022501 | 5.71522399 | 2.00E-08   | 8.35E-08   | 8.10766535 |
| BILE_ACID_METABOLISM              | -0.0829384 | 0.00096038 | -5.5688042 | 4.43E-08   | 1.71E-07   | 7.33659054 |
| ALLOGRAFT_REJECTION               | -0.1437355 | 0.01401155 | -4.8829511 | 1.46E-06   | 5.21E-06   | 3.9599172  |
| HYPOXIA                           | 0.0842771  | 0.00031816 | 4.67018078 | 3.99E-06   | 1.33E-05   | 2.99306521 |
| KRAS_SIGNALING_DN                 | -0.0469789 | 0.0068902  | -4.468917  | 9.98E-06   | 3.12E-05   | 2.11450914 |
| HEDGEHOG_SIGNALING                | -0.0913385 | 0.00529667 | -4.429016  | 1.19E-05   | 3.50E-05   | 1.94453034 |
| REACTIVE_OXYGEN_SPECIES_PATHWAY   | 0.09825984 | -0.0043763 | 4.27935369 | 2.29E-05   | 6.37E-05   | 1.31943595 |
| KRAS_SIGNALING_UP                 | -0.0830934 | 0.0163604  | -4.2252653 | 2.89E-05   | 7.62E-05   | 1.09839178 |
| IL6_JAK_STAT3_SIGNALING           | -0.1053056 | 0.01622959 | -3.8265279 | 0.00014847 | 0.00037117 | -0.4505068 |
| MYOGENESIS                        | -0.0695615 | 0.00553376 | -3.5989193 | 0.00035527 | 0.00084589 | -1.2702205 |
| UV_RESPONSE_DN                    | -0.0675196 | 0.00571081 | -3.572143  | 0.00039253 | 0.00089211 | -1.3635402 |
| HEME_METABOLISM                   | -0.0396568 | 0.00064675 | -3.4399678 | 0.00063638 | 0.00138344 | -1.8145324 |
| CHOLESTEROL_HOMEOSTASIS           | 0.06201232 | -0.0013304 | 3.31714997 | 0.00098365 | 0.00199013 | -2.2191329 |
| IL2_STAT5_SIGNALING               | -0.0657022 | 0.01273005 | -3.312192  | 0.00100082 | 0.00199013 | -2.2351724 |
| INFLAMMATORY_RESPONSE             | -0.0857084 | 0.0151908  | -3.3025889 | 0.00103487 | 0.00199013 | -2.2661739 |
| UV_RESPONSE_UP                    | 0.04417687 | 0.00029316 | 3.26428057 | 0.00118169 | 0.00218832 | -2.3889915 |
| PROTEIN_SECRETION                 | 0.05112901 | -0.0031184 | 3.22326058 | 0.00136016 | 0.00242886 | -2.5189877 |
| PI3K_AKT_MTOR_SIGNALING           | 0.0404931  | 0.00291661 | 2.88598284 | 0.00409087 | 0.00705322 | -3.528099  |
| COMPLEMENT                        | -0.0589269 | 0.0134598  | -2.6770296 | 0.00770107 | 0.01283512 | -4.0993966 |
| APICAL_SURFACE                    | -0.0451841 | 0.00774715 | -2.4779077 | 0.01358394 | 0.02190958 | -4.6050983 |
| FATTY_ACID_METABOLISM             | 0.04144669 | -0.0061453 | 2.29511976 | 0.02218869 | 0.03438816 | -5.0358288 |
| EPITHELIAL_MESENCHYMAL_TRANSITION | 0.07455196 | 0.00378558 | 2.28642747 | 0.02269618 | 0.03438816 | -5.0555098 |

|                            |            |            |            |            |            |            |
|----------------------------|------------|------------|------------|------------|------------|------------|
| ANGIOGENESIS               | 0.05691404 | 0.00874816 | 2.17375336 | 0.03024784 | 0.04448211 | -5.3040179 |
| TGF_BETA_SIGNALING         | -0.0394669 | 0.00478329 | -1.8165594 | 0.06995427 | 0.09993467 | -6.0103428 |
| COAGULATION                | -0.0310036 | 0.01303114 | -1.651746  | 0.09928865 | 0.1379009  | -6.2942443 |
| INTERFERON_GAMMA_RESPONSE  | -0.0480124 | 0.01126827 | -1.5313757 | 0.12638401 | 0.1707892  | -6.4847434 |
| PEROXISOME                 | -0.021117  | -0.0018099 | -1.4895197 | 0.13705582 | 0.1803366  | -6.5476446 |
| ESTROGEN_RESPONSE_EARLY    | 0.02020657 | 0.00047156 | 1.46365769 | 0.14399039 | 0.18460306 | -6.5856476 |
| APICAL_JUNCTION            | 0.02216599 | 0.00865736 | 1.15499329 | 0.24871026 | 0.31088783 | -6.988233  |
| ADIPOGENESIS               | 0.01307159 | -0.0005836 | 0.83805422 | 0.40244817 | 0.49079045 | -7.3033605 |
| TNFA_SIGNALING_VIA_NFKB    | -0.0214662 | 0.00237599 | -0.7707944 | 0.44123602 | 0.52528098 | -7.3547389 |
| PANCREAS_BETA_CELLS        | -0.0124738 | 0.00066424 | -0.7340097 | 0.46332769 | 0.53875313 | -7.3850316 |
| P53_PATHWAY                | -0.0109465 | 0.00169943 | -0.7163995 | 0.47411881 | 0.53877138 | -7.3977879 |
| NOTCH_SIGNALING            | -0.0083827 | 0.00302563 | -0.4278185 | 0.66898935 | 0.7433215  | -7.562764  |
| ANDROGEN_RESPONSE          | -0.0045704 | 0.00171808 | -0.3083337 | 0.75797209 | 0.80754753 | -7.6067311 |
| WNT_BETA_CATENIN_SIGNALING | -0.0054064 | 0.00235797 | -0.3068576 | 0.75909468 | 0.80754753 | -7.607185  |
| INTERFERON_ALPHA_RESPONSE  | 0.00928355 | 0.01103864 | 0.26370867 | 0.79212594 | 0.82513119 | -7.6194928 |
| XENOBIOTIC_METABOLISM      | -0.0020464 | 0.0031522  | -0.1386375 | 0.88979905 | 0.90795821 | -7.644652  |
| APOPTOSIS                  | 0.00119311 | 0.00997577 | 0.06645864 | 0.9470424  | 0.9470424  | -7.6520538 |

GSVA enrichment HALLMARK functions between high and low-PCDscoregroup in GSE31210

| Tag                               | logFC      | AveExpr    | t          | P.Value    | adj.P.Val  | B          |
|-----------------------------------|------------|------------|------------|------------|------------|------------|
| GLYCOLYSIS                        | 0.38301869 | -0.0045916 | 17.8020909 | 1.88E-46   | 9.40E-45   | 94.8974394 |
| MTORC1_SIGNALING                  | 0.42344306 | -0.0113756 | 17.6310654 | 7.27E-46   | 1.82E-44   | 93.5474998 |
| UNFOLDED_PROTEIN_RESPONSE         | 0.34561066 | -0.0073474 | 15.6996736 | 3.39E-39   | 5.65E-38   | 78.2334782 |
| MYC_TARGETS_V1                    | 0.42612733 | -0.0212983 | 14.9228096 | 1.65E-36   | 2.06E-35   | 72.0662094 |
| E2F_TARGETS                       | 0.47213655 | -0.0312316 | 14.5898449 | 2.32E-35   | 2.32E-34   | 69.4277178 |
| G2M_CHECKPOINT                    | 0.39655946 | -0.0246535 | 13.2063169 | 1.30E-30   | 1.08E-29   | 58.5345272 |
| MYC_TARGETS_V2                    | 0.39270014 | -0.0242504 | 12.9347971 | 1.09E-29   | 7.80E-29   | 56.4166747 |
| DNA_REPAIR                        | 0.31020966 | -0.009591  | 12.8536326 | 2.06E-29   | 1.29E-28   | 55.7852668 |
| PROTEIN_SECRETION                 | 0.29239919 | -0.0016918 | 12.0273194 | 1.25E-26   | 6.92E-26   | 49.4088469 |
| OXIDATIVE_PHOSPHORYLATION         | 0.33493972 | -0.0122518 | 10.4670109 | 1.60E-21   | 7.99E-21   | 37.7162661 |
| PI3K_AKT_MTOR_SIGNALING           | 0.19667989 | -0.0029553 | 9.75058898 | 2.90E-19   | 1.32E-18   | 32.5554611 |
| REACTIVE_OXYGEN_SPECIES_PATHWAY   | 0.20242751 | -0.0036705 | 8.42099907 | 2.86E-15   | 1.19E-14   | 23.4464963 |
| ANDROGEN_RESPONSE                 | 0.14535941 | -0.0028583 | 7.97689748 | 5.28E-14   | 2.03E-13   | 20.5665689 |
| UV_RESPONSE_UP                    | 0.15540818 | -0.0011948 | 7.66841791 | 3.79E-13   | 1.35E-12   | 18.62101   |
| HYPOXIA                           | 0.18402293 | -0.0014396 | 7.64554161 | 4.38E-13   | 1.46E-12   | 18.47861   |
| MITOTIC_SPINDLE                   | 0.14216575 | -0.0077348 | 7.59127946 | 6.17E-13   | 1.93E-12   | 18.1419017 |
| MYOGENESIS                        | -0.1515978 | 0.00011706 | -6.8971616 | 4.26E-11   | 1.25E-10   | 13.9725988 |
| INTERFERON_ALPHA_RESPONSE         | 0.27746548 | 0.00092603 | 6.56941935 | 2.88E-10   | 7.99E-10   | 12.0983408 |
| UV_RESPONSE_DN                    | -0.1280173 | 0.00528306 | -5.672464  | 3.85E-08   | 1.01E-07   | 7.31075993 |
| INTERFERON_GAMMA_RESPONSE         | 0.20768953 | 0.00866199 | 5.58260145 | 6.12E-08   | 1.53E-07   | 6.8604878  |
| APOPTOSIS                         | 0.1158059  | 0.00641402 | 5.41669029 | 1.42E-07   | 3.37E-07   | 6.04396056 |
| ADIPOGENESIS                      | 0.13161947 | 0.0019125  | 5.24065913 | 3.39E-07   | 7.69E-07   | 5.19900919 |
| FATTY_ACID_METABOLISM             | 0.12832255 | -0.0023642 | 5.22506571 | 3.65E-07   | 7.94E-07   | 5.1252379  |
| ESTROGEN_RESPONSE_LATE            | 0.08322242 | 3.23E-05   | 4.80282386 | 2.69E-06   | 5.40E-06   | 3.19596218 |
| SPERMATOGENESIS                   | 0.07049199 | -0.0017604 | 4.80195319 | 2.70E-06   | 5.40E-06   | 3.19212245 |
| BILE_ACID_METABOLISM              | -0.0802853 | 0.00543095 | -4.5548726 | 8.17E-06   | 1.57E-05   | 2.12609756 |
| IL6_JAK_STAT3_SIGNALING           | 0.13524161 | 0.0026333  | 4.37084088 | 1.81E-05   | 3.35E-05   | 1.36316316 |
| COMPLEMENT                        | 0.11520645 | 0.00507262 | 4.26182781 | 2.87E-05   | 5.12E-05   | 0.92397897 |
| ALLOGRAFT_REJECTION               | 0.13121237 | 0.00329676 | 3.84941746 | 0.00015017 | 0.00025891 | -0.64966   |
| CHOLESTEROL_HOMEOSTASIS           | 0.09831607 | -0.0040412 | 3.54883425 | 0.00046148 | 0.00076914 | -1.7067581 |
| INFLAMMATORY_RESPONSE             | 0.10111057 | 0.00590991 | 3.36890676 | 0.00087296 | 0.00137376 | -2.3023258 |
| NOTCH_SIGNALING                   | -0.0843372 | 0.00600555 | -3.3668512 | 0.0008792  | 0.00137376 | -2.3089667 |
| XENOBIOTIC_METABOLISM             | 0.06042633 | 0.00276771 | 3.34769422 | 0.00093947 | 0.00142343 | -2.3706785 |
| EPITHELIAL_MESENCHYMAL_TRANSITION | 0.1214046  | 0.00095902 | 3.19789579 | 0.00156152 | 0.00229636 | -2.8420887 |
| PEROXISOME                        | 0.06462652 | -0.00096   | 3.12804665 | 0.00196663 | 0.00280947 | -3.0551028 |
| KRAS_SIGNALING_DN                 | -0.0370435 | 0.00315107 | -2.9773046 | 0.00319137 | 0.00443246 | -3.4999392 |
| WNT_BETA_CATENIN_SIGNALING        | -0.0599334 | 0.00279638 | -2.8038671 | 0.00544264 | 0.00735491 | -3.9863665 |
| IL2_STAT5_SIGNALING               | 0.049473   | 0.00298012 | 2.17498421 | 0.03056194 | 0.04021308 | -5.5175639 |
| P53_PATHWAY                       | 0.0384629  | -0.0009502 | 2.12658799 | 0.03442681 | 0.04413693 | -5.6200318 |
| PANCREAS_BETA_CELLS               | 0.04134868 | -0.0019837 | 1.88773119 | 0.0602116  | 0.0752645  | -6.0930626 |
| TGF_BETA_SIGNALING                | -0.0567822 | -0.0003828 | -1.8110654 | 0.07132201 | 0.08697806 | -6.2332982 |
| ANGIOGENESIS                      | 0.05254435 | 0.00296081 | 1.57357599 | 0.11684075 | 0.13909613 | -6.6316631 |
| COAGULATION                       | 0.02866824 | 0.00410528 | 1.45452451 | 0.14704597 | 0.17098368 | -6.8107335 |
| HEDGEHOG_SIGNALING                | -0.0287901 | 0.00047397 | -1.184954  | 0.23715247 | 0.26949144 | -7.1649164 |
| HEME_METABOLISM                   | 0.01237505 | 0.00255379 | 0.86834661 | 0.38603123 | 0.42892359 | -7.4893903 |
| KRAS_SIGNALING_UP                 | 0.01868133 | 0.00612333 | 0.81331536 | 0.41680542 | 0.45304936 | -7.5356489 |
| ESTROGEN_RESPONSE_EARLY           | -0.0147261 | 0.00113379 | -0.7953492 | 0.42715929 | 0.45442478 | -7.550099  |
| TNFA_SIGNALING_VIA_NFKB           | 0.0104004  | -0.0028786 | 0.27954801 | 0.78005372 | 0.81255596 | -7.8276235 |
| APICAL_SURFACE                    | 0.00447475 | 0.00846065 | 0.19531419 | 0.84530445 | 0.86255556 | -7.8476691 |
| APICAL_JUNCTION                   | 0.00213137 | 0.00190307 | 0.10581898 | 0.91581021 | 0.91581021 | -7.8611768 |

Supplementary Table 6 The correlation between the IC50 of various drugs and PCD1

|                    | CHEK2      | KRT18      | GAPDH      | MMP1        | CHRNA5     | TPMRSS4     | ITGB4      | CD79A      | CTLA4      | RRM2        | PCD1        |
|--------------------|------------|------------|------------|-------------|------------|-------------|------------|------------|------------|-------------|-------------|
| Camptothecin_1003  | -0.0277197 | 0.21147061 | 0.03807721 | -0.0599118  | -0.0078515 | 0.07258063  | 0.16814124 | -0.3263178 | -0.4105553 | -0.016624   | 0.24060552  |
| Cisplatin_1005     | -0.3014577 | 0.13877372 | -0.1137259 | -0.2116566  | -0.1376721 | 0.12009934  | 0.23027804 | -0.3820834 | -0.4682946 | -0.269967   | 0.12822277  |
| Cytarabine_1006    | -0.1228067 | 0.10009897 | 0.00613326 | -0.0574995  | -0.1727008 | 0.06298496  | 0.18530429 | -0.2381881 | -0.3043414 | -0.0378578  | 0.17869708  |
| Docetaxel_1007     | -0.3708936 | -0.1575163 | -0.4047335 | -0.2409157  | -0.3019893 | 0.06475126  | -0.0297939 | -0.1296269 | -0.0329519 | -0.4133552  | -0.2595271  |
| Gefitinib_1010     | -0.3289532 | -0.1808259 | -0.1973529 | -0.0830007  | -0.1552752 | -0.0394872  | -0.2689281 | -0.0531831 | -0.073148  | -0.2159908  | -0.1601608  |
| Navitoclax_1011    | -0.4257151 | -0.1465191 | -0.2062069 | -0.0960176  | -0.2226856 | -0.1362883  | -0.064148  | -0.3846643 | -0.5037999 | -0.2535308  | 0.15576992  |
| Vorinostat_1012    | -0.2151488 | 0.12500688 | 0.10377596 | 0.0451534   | -0.1010756 | 0.15473963  | 0.268215   | -0.3295218 | -0.3204994 | -0.01565773 | 0.34237699  |
| Nilotinib_1013     | -0.3748422 | 0.04080437 | -0.1341602 | -0.0286712  | -0.1904229 | 0.06870403  | 0.20066015 | -0.3492303 | -0.4195549 | -0.1444665  | 0.27588086  |
| Olaparib_1017      | -0.0583499 | 0.3022778  | 0.19137643 | -0.040632   | -0.0195933 | 0.19119625  | 0.28809323 | -0.3649252 | -0.3294522 | 0.10340985  | 0.37059867  |
| Axitinib_1021      | -0.4124311 | -0.2053416 | -0.2635549 | -0.1894873  | -0.1171377 | -0.2675695  | -0.2133281 | -0.4782055 | -0.5474287 | -0.175795   | 0.21224766  |
| AZD7762_1022       | -0.2952852 | 0.01522821 | -0.2876414 | -0.2574199  | -0.0681878 | -0.13087336 | -0.0297172 | -0.2677386 | -0.4035883 | -0.4114073  | -0.1409257  |
| SB216763_1025      | 0.1272441  | 0.21934127 | 0.18336618 | -0.1434112  | 0.26705817 | -0.0216762  | -0.0612562 | -0.5516313 | -0.6056218 | 0.21956315  | 0.47420601  |
| KU-5933_1030       | 0.04758155 | 0.16856047 | -0.0114773 | -0.3226634  | 0.16492299 | -0.0319197  | -0.0697398 | -0.490972  | -0.4588715 | -0.0390492  | 0.18280736  |
| Afatinib_1032      | -0.3429652 | -0.2830414 | -0.2761091 | -0.1255792  | -0.04475   | -0.2860722  | -0.4493504 | -0.0952129 | -0.1055171 | -0.1657597  | -0.1252732  |
| PLX-4720_1036      | -0.3005547 | -0.1020228 | -0.2383449 | -0.2781177  | -0.0438952 | -0.1454581  | -0.2371357 | -0.4401521 | -0.4658228 | -0.1282739  | 0.11424827  |
| NU7441_1038        | 0.14341335 | 0.31061004 | 0.19084615 | -0.1973803  | 0.2153408  | 0.11879603  | 0.08195872 | -0.4413436 | -0.3608888 | 0.15472449  | 0.33455333  |
| Doramipimod_1042   | 0.16636933 | 0.34506768 | 0.43789079 | 0.11937237  | 0.24279945 | -0.0061706  | 0.22607524 | -0.4529194 | -0.3373685 | 0.46690222  | 0.70087288  |
| Nutlin-3a (-)_1047 | 0.25005362 | 0.27097474 | 0.30796818 | -0.026692   | 0.10258895 | 0.09129576  | 0.08238341 | -0.3084728 | -0.1616701 | 0.42323303  | 0.42734069  |
| PD173074_1049      | -0.3736704 | -0.0159348 | -0.1080423 | -0.1352999  | -0.1620865 | -0.0441806  | 0.00139367 | -0.4470499 | -0.4501916 | -0.1184216  | 0.24544349  |
| ZM447439_1050      | -0.3771918 | -0.1798519 | -0.2466623 | -0.2329426  | -0.052997  | -0.2551585  | -0.2773652 | -0.4695758 | -0.5535211 | -0.2223149  | 0.13588029  |
| RO-3306_1052       | -0.1610234 | 0.11774988 | 0.00537315 | -0.1282227  | -0.0139345 | -0.0371138  | -0.0062172 | -0.3802036 | -0.3955929 | -0.0391429  | 0.28103798  |
| MK-2206_1053       | -0.3212011 | -0.1600476 | -0.1885728 | -0.0894827  | -0.1220665 | -0.2191229  | -0.1632907 | -0.4647321 | -0.3192614 | 0.02645143  | 0.29819633  |
| Palbosiclib_1054   | -0.1970075 | -0.1642713 | -0.1983832 | -0.116156   | -0.1318079 | -0.178303   | -0.1206853 | -0.3537631 | -0.3271859 | 0.04634263  | 0.22025061  |
| Dactolisib_1057    | -0.1698423 | -0.1361408 | -0.1741217 | -0.1143722  | -0.1247409 | -0.0460390  | -0.0853758 | -0.3138296 | -0.208913  | 0.03565055  | 0.18278772  |
| AZD8055_1059       | -0.2359608 | -0.096765  | -0.2274847 | -0.194474   | 0.01189759 | -0.1083273  | -0.1155196 | -0.5779018 | -0.6053584 | -0.0595145  | 0.3031285   |
| Dasatinib_1079     | -0.2144958 | -0.1684553 | -0.3462612 | -0.3974917  | 0.07893424 | -0.0665365  | -0.3699857 | -0.3327124 | -0.4172416 | -0.317197   | -0.1978192  |
| Paclitaxel_1080    | -0.5865981 | -0.2939354 | -0.487601  | -0.2211782  | -0.3330026 | -0.0334875  | -0.11098   | -0.2245567 | -0.2420883 | -0.4803678  | -0.1858105  |
| Rapamycin_1084     | -0.5523774 | -0.2878413 | -0.4050557 | -0.1509988  | -0.284199  | -0.0835913  | -0.0835924 | -0.3847978 | -0.380851  | -0.2764471  | 0.10321643  |
| Sorafenib_1085     | -0.3753892 | -0.0563088 | -0.1256252 | 0.02389747  | -0.2689114 | -0.016138   | 0.12623486 | -0.3191844 | -0.2624195 | -0.1026959  | 0.24606538  |
| BI-2536_1086       | 0.02687951 | 0.26796386 | 0.17383359 | 0.06518288  | -0.085494  | 0.32565163  | 0.37086332 | 0.39948565 | 0.4562019  | -0.1110485  | -0.23196504 |
| Irinotecan_1088    | -0.0741568 | 0.19835609 | 0.06749791 | -0.0517816  | -0.0248552 | 0.03566093  | 0.17878663 | -0.3692143 | -0.3926381 | 0.03431427  | 0.31180042  |
| Oxaliplatin_1089   | -0.0873808 | 0.12536836 | 0.03973475 | -0.0086275  | -0.0766268 | -0.0007775  | 0.1724065  | -0.3503792 | -0.3274636 | 0.06302105  | 0.30109968  |
| BMS-536924_1091    | -0.1208741 | -0.2878781 | -0.3180231 | -0.2703974  | -0.1617891 | -0.12970759 | -0.3748197 | -0.2382168 | -0.1241596 | -0.12031754 | -0.1310854  |
| GSK1904529A_1093   | -0.4388571 | -0.0567293 | -0.1291898 | 0.05637147  | -0.2923928 | 0.07866465  | 0.1963655  | -0.2172034 | -0.1790327 | -0.188665   | 0.14296416  |
| PF-4708671_1129    | -0.3190767 | -0.2441043 | -0.2427395 | -0.1631264  | -0.0424856 | -0.3073561  | -0.2901456 | -0.532464  | -0.5808514 | -0.0871819  | 0.25308408  |
| PRIMA-1MET_1131    | 0.07838335 | 0.32802524 | 0.28609589 | -0.0009399  | 0.29930523 | 0.18262504  | 0.12340439 | -0.3947586 | -0.5109173 | 0.02137079  | 0.47778522  |
| Erlotinib_1168     | 0.13718414 | 0.21749063 | 0.13188175 | 0.0617878   | 0.06969945 | 0.24349619  | 0.09172509 | 0.14297505 | 0.18009192 | 0.02450599  | -0.0917484  |
| Niraparib_1177     | 0.07140338 | 0.32214259 | 0.28671798 | 0.05338558  | 0.0721365  | 0.35085776  | 0.25082335 | -0.3409469 | -0.3504848 | 0.29158163  | 0.49022175  |
| MK-1775_1179       | -0.5717767 | -0.3397528 | -0.5238106 | -0.234828   | -0.3713942 | -0.0722608  | -0.201241  | -0.2551298 | -0.397283  | -0.5801197  | -0.2440999  |
| Dinaciclib_1180    | -0.3549613 | -0.096433  | -0.1888302 | -0.2037468  | -0.1163941 | -0.028828   | -0.098145  | -0.4058694 | -0.3709944 | -0.1739125  | 0.10378723  |
| Gemcitabine_1190   | -0.0636418 | 0.14825993 | -0.0367003 | -0.1463507  | -0.0080621 | 0.05956283  | 0.0740288  | -0.3374989 | -0.4628606 | -0.1149328  | 0.13383893  |
| GSK269962A_1192    | -0.2580109 | -0.1337514 | -0.1202522 | -0.1561709  | -0.0216621 | -0.2059719  | -0.1649784 | -0.5639795 | -0.5149784 | 0.03029698  | 0.36765154  |
| SB505124_1194      | 0.53059374 | 0.43695547 | 0.58167508 | 0.29573509  | 0.16547041 | 0.23191779  | 0.42373742 | 0.36483873 | 0.54218374 | 0.53380435  | 0.19816972  |
| Tamoxifen_1199     | -0.1206625 | 0.15932373 | 0.0234707  | 0.06235868  | -0.1544163 | 0.17178167  | 0.30137564 | -0.2178422 | -0.0746031 | 0.01490149  | 0.21035645  |
| Fulvestrant_1200   | -0.3269822 | 0.13000195 | 0.02569402 | -0.0210256  | -0.1094127 | 0.10580132  | 0.21507545 | -0.37972   | -0.3970621 | -0.076634   | 0.31118109  |
| EPZ004777_1237     | -0.106507  | 0.12711819 | -0.0124196 | -0.0914726  | -0.0739911 | 0.06794677  | 0.10449374 | -0.4966123 | -0.5132459 | -0.0950251  | 0.31315418  |
| YK-4-279_1239      | -0.4559584 | -0.2339708 | -0.4410561 | -0.2604067  | -0.2730775 | -0.0587928  | -0.172119  | -0.3426605 | -0.4075887 | -0.4046008  | -0.0959561  |
| Daporinad_1248     | -0.1413959 | 0.19708194 | 0.17328344 | 0.03326987  | -0.0794574 | 0.05611569  | 0.23418284 | -0.1388559 | -0.0969175 | -0.002097   | 0.20625789  |
| BMS-345541_1249    | -0.5177258 | -0.4059038 | -0.5011478 | -0.1612714  | -0.3674142 | -0.1713522  | -0.2968315 | -0.2389862 | -0.3388027 | -0.3826901  | -0.11717059 |
| Talazoparib_1259   | -0.1087286 | 0.14497762 | 0.06487503 | -0.0472603  | -0.1449804 | 0.06196493  | 0.20673609 | -0.3380487 | -0.3275079 | 0.06095955  | 0.33029617  |
| XAV939_1268        | -0.1918474 | 0.01674988 | -0.107352  | -0.2033078  | -0.0322733 | 0.09787392  | -0.0906039 | -0.4001275 | -0.481931  | -0.1420299  | 0.10778211  |
| Trametinib_1372    | 0.36935812 | -0.0174672 | 0.01663268 | -0.1961666  | 0.22031076 | -0.0944165  | -0.3832133 | 0.06686467 | 0.05819882 | 0.20708371  | -0.1358696  |
| Dabrafenib_1373    | -0.2070888 | -0.0474304 | -0.153856  | -0.1865404  | -0.1729331 | -0.0381284  | 0.01187443 | -0.4211633 | -0.3531226 | -0.1194903  | 0.14867072  |
| Temozolomide_1375  | -0.2706478 | 0.06356931 | -0.0908165 | -0.1154833  | -0.1231508 | 0.0786245   | 0.08610547 | -0.4116314 | -0.3173463 | -0.1125924  | 0.13671923  |
| AZD5438_1401       | -0.2069344 | 0.01078886 | -0.0976212 | -0.2150812  | -0.0894353 | -0.0055218  | 0.02451142 | -0.4162667 | -0.3627673 | -0.084347   | 0.17008525  |
| IAP_5620_1428      | -0.096152  | 0.26754001 | 0.11545755 | 0.03824162  | 0.0027803  | 0.31288597  | 0.40505164 | -0.1210279 | -0.1087557 | -0.065398   | 0.13685253  |
| AZD2014_1441       | -0.015587  | -0.0904356 | -0.1044965 | -0.2313582  | 0.0121927  | -0.1014063  | -0.301144  | -0.2000355 | 0.13228026 | 0.15941876  | 0.15941876  |
| AZD1208_1449       | -0.1410731 | 0.23870015 | 0.15862625 | 0.028180018 | -0.0946443 | 0.12544793  | 0.23961292 | -0.3849627 | -0.3757237 | 0.0545407   | 0.40379169  |
| AZD1332_1463       | -0.1601289 | -0.0928128 | -0.1372288 | -0.288812   | -0.0351774 | -0.1200603  | -0.2953631 | -0.40291   | -0.39671   | -0.0250198  | 0.12859419  |
| Ruxolitinib_1507   | -0.2932896 | 0.03551429 | -0.0963706 | -0.1102966  | -0.0670396 | 0.04770246  | 0.00856058 | -0.3905573 | -0.5987498 | -0.1866739  | 0.20297018  |
| Linsitinib_1510    | -0.3985807 | -0.2270882 | -0.2022813 | -0.0180784  | -0.3106215 | -0.084951   | -0.0761454 | -0.3158402 | -0.2103956 | -0.11044702 | 0.31110564  |
| Epirubicin_1511    | 0.03152348 | 0.23767845 | 0.15137505 | -0.0602686  | 0.08279156 | 0.16422856  | 0.14572271 | -0.317931  | -0.3158861 | 0.10388665  | 0.29470738  |
| Cyclophosphamide_1 | -0.2896536 | 0.1546426  | 0.02401092 | -0.0495687  | -0.0872785 | 0.12609269  | 0.22896384 | -0.3999638 | -0.3943467 | -0.067247   | 0.30947982  |
| Sapitinib_1549     | -0.1180685 | -0.2013092 | -0.1267395 | -0.0650085  | 0.07940717 | -0.1940239  | -0.4488041 | 0.02970899 | 0.10300694 | -0.0259975  | -0.1956667  |
| Uproresitib_1553   | -0.1927794 | -0.0657224 | -0.1065692 | -0.0707687  | 0.01522752 | -0.1726248  | -0.2129491 | -0.3425369 | -0.216227  | 0.12174419  | 0.26917097  |
| Lapatinib_1558     | -0.5070329 | -0.3511463 | -0.40912   | -0.127796   | -0.3072722 | -0.1272407  | -0.2315658 | -0.1495692 | -0.1285243 | -0.3347011  | -0.1781544  |
| EPZ5676_1563       | -0.2434989 | 0.18184491 | 0.01304947 | -0.047625   | -0.0830963 | 0.14791324  | 0.17471008 | -0.3785253 | -0.4425576 | -0.1154802  | 0.26073149  |
| SCH72984_1564      | 0.27637337 | -0.015508  | -0.0308547 | -0.1916494  | 0.11904367 | -0.0468794  | -0.2982433 | 0.11089062 | 0.09352661 | 0.0942668   | -0.2193997  |
| IWP-2_1576         | -0.3923308 | -0.0312623 | -0.2008842 | -0.1212206  | -0.1980808 | 0.05738098  | 0.03040269 | -0.4090452 | -0.5249751 | -0.2657211  | 0.12557762  |
|                    |            |            |            |             |            |             |            |            |            |             |             |



|                       |             |            |            |            |             |             |            |             |            |            |             |
|-----------------------|-------------|------------|------------|------------|-------------|-------------|------------|-------------|------------|------------|-------------|
| TAF1_5496_1732        | -0.1000162  | 0.15462521 | 0.22243482 | 0.16186572 | -0.2268938  | 0.02773541  | 0.37645887 | -0.1359319  | 0.03413446 | 0.13938343 | 0.35080849  |
| JAK_8517_1739         | 0.01070863  | 0.16190048 | 0.06444485 | -0.2159946 | 0.11931502  | 0.05865134  | -0.1253858 | -0.3219625  | -0.3058083 | 0.0609285  | 0.14581813  |
| AZD4547_1786          | -0.2285584  | 0.05935227 | -0.0526386 | -0.0409755 | -0.2954323  | 0.08800339  | 0.2425553  | -0.2669188  | -0.0874726 | -0.0717677 | 0.1585501   |
| Zoledronate_1802      | -0.24447564 | 0.09769494 | 0.00958223 | -0.0441162 | -0.082386   | 0.068616259 | 0.09785971 | -0.4100961  | -0.4497548 | -0.0158908 | 0.35045927  |
| Oxaliplatin_1806      | 0.02195937  | 0.21149385 | 0.17682132 | 0.05388806 | 0.02710091  | 0.06738403  | 0.16628365 | -0.3260506  | -0.2703958 | 0.22988837 | 0.3809181   |
| Carmustine_1807       | -0.31457505 | 0.06763343 | -0.0303745 | -0.0008047 | -0.190296   | 0.11550581  | 0.15596117 | -0.2644103  | -0.3533693 | -0.1427949 | 0.19226225  |
| Topotecan_1808        | -0.0187625  | 0.2248393  | 0.08072274 | -0.0307688 | 0.04259046  | 0.0832327   | 0.16440652 | -0.3441662  | -0.4799709 | 0.01348155 | 0.28545711  |
| Toposide_1809         | -0.1093864  | 0.15113512 | -0.0407801 | -0.0954119 | -0.0262152  | 0.11031333  | 0.13049086 | -0.4225848  | -0.5524853 | -0.1078454 | 0.23862044  |
| Mitoxantrone_1810     | 0.23223636  | 0.42326677 | 0.27463525 | 0.03582853 | 0.15306198  | 0.23475719  | 0.26463574 | -0.2656711  | -0.3223069 | 0.21854716 | 0.3440166   |
| Dactinomycin_1811     | -0.113034   | 0.05491626 | -0.0853975 | -0.0735445 | -0.048769   | 0.04735438  | 0.00262288 | -0.2357633  | -0.3155931 | -0.0304751 | 0.1172423   |
| Fludarabine_1813      | -0.0648572  | 0.16869225 | -0.0537378 | -0.1123234 | 0.10977897  | 0.11114636  | 0.02811607 | -0.3911301  | -0.5715646 | -0.0571196 | 0.20277515  |
| Nelarabine_1814       | -0.1881396  | 0.15238827 | 0.05413296 | -0.0810922 | -0.0319125  | 0.08007957  | 0.0667574  | -0.3856965  | -0.4897917 | -0.066936  | 0.26549064  |
| Fulvestrant_1816      | -0.5091264  | -0.1787651 | -0.2318575 | 0.01691778 | -0.3580782  | -0.0140457  | 0.09779733 | -0.274222   | -0.3199798 | -0.2770848 | 0.09674767  |
| Docetaxel_1819        | -0.3727593  | -0.1992663 | -0.3946443 | -0.2619882 | -0.252197   | 0.0493687   | -0.1092043 | -0.2655111  | -0.2324171 | -0.4035652 | -0.2006044  |
| Dihydrorotenone_182   | -0.3295266  | -0.1049405 | -0.0274829 | 0.11981172 | -0.358633   | -0.0809313  | 0.23524192 | -0.1130666  | 0.03589766 | -0.0515694 | 0.17277058  |
| Gallibiscoquinazole_1 | -0.4895026  | -0.1111952 | -0.2307576 | -0.0762523 | -0.299572   | -0.0345167  | 0.07909262 | -0.3594092  | -0.4242543 | -0.3067887 | 0.13830101  |
| Elephantin_1835       | -0.0905699  | 0.19845092 | 0.19212407 | 0.0232257  | 0.15610568  | 0.14726844  | 0.11714022 | -0.3480886  | -0.3301177 | 0.14265423 | 0.37469661  |
| Sinularin_1838        | -0.26438    | 0.03805758 | 0.10311372 | 0.12872996 | -0.105918   | 0.02535527  | 0.0838366  | -0.1521811  | -0.170156  | 0.04619639 | 0.27736149  |
| Sabutoxax_1849        | -0.2150834  | 0.17833773 | 0.05534815 | 0.04546928 | -0.0457239  | 0.18744339  | 0.23055983 | -0.3421915  | -0.3488243 | 0.0167976  | 0.30898012  |
| LY2109761_1852        | -0.1303236  | 0.15987145 | 0.09205695 | -0.029635  | -0.0503716  | 0.0125987   | 0.07329922 | -0.3601542  | -0.3898774 | 0.03253172 | 0.32721192  |
| OF-1_1853             | -0.1038562  | 0.15619797 | 0.22245749 | 0.18633178 | -0.2210082  | 0.06963265  | 0.43403566 | -0.1099522  | 0.04209485 | 0.16471099 | 0.37536142  |
| MN-64_1854            | -0.3540218  | -0.0007157 | -0.1125968 | -0.1142623 | -0.02786537 | 0.04106496  | -0.0537685 | -0.2951629  | -0.3871353 | -0.1794585 | 0.13209998  |
| KRAS (G12C) Inhibitor | -0.3921341  | -0.0476327 | -0.0746157 | 0.00891529 | -0.229198   | -0.0202181  | 0.14579133 | -0.2741592  | -0.2581254 | -0.1024708 | 0.22505463  |
| Venetoax_1909         | -0.1463323  | 0.23272709 | 0.07811638 | -0.0908839 | -0.037257   | 0.12836886  | 0.26244857 | -0.4477299  | -0.4148352 | -0.0144763 | 0.35444277  |
| ABT737_1910           | -0.1046448  | 0.27900187 | 0.1821029  | -0.004434  | 0.01003696  | 0.15550475  | 0.25810578 | -0.3335226  | -0.3710959 | -0.0015562 | 0.32002001  |
| Dactinomycin_1911     | -0.0047497  | 0.15798101 | 0.04957316 | -0.0505247 | 0.00888228  | -0.15063101 | 0.11284346 | -0.1743181  | -0.0669797 | 0.07702809 | 0.12986414  |
| Afuresomybin_1912     | -0.2954228  | -0.0657279 | -0.118413  | -0.093794  | -0.0093464  | -0.2084502  | 0.1009493  | -0.3578599  | -0.192318  | 0.0509424  | 0.25189532  |
| AGI-5198_1913         | -0.1939331  | 0.21054485 | 0.02338724 | -0.0443822 | -0.0807156  | 0.16245009  | 0.28062164 | -0.3870318  | -0.3740703 | -0.0637075 | 0.2924694   |
| AZD5363_1916          | -0.4131431  | -0.2015161 | -0.3068913 | -0.2015806 | -0.1452874  | -0.219226   | -0.2163318 | -0.4034378  | -0.3107998 | -0.1253622 | 0.11793163  |
| AZD6738_1917          | -0.4835789  | -0.2831137 | -0.5067418 | -0.3091126 | -0.3247267  | -0.0627217  | -0.2029248 | -0.2569479  | -0.3983306 | -0.5159192 | -0.2349462  |
| AZD8186_1918          | -0.122481   | -0.105849  | -0.2009776 | -0.2467904 | 0.09788827  | -0.1983322  | -0.3590327 | -0.437167   | -0.4002473 | -0.0030543 | 0.14831213  |
| Osimertinib_1919      | -0.4461068  | -0.3757618 | -0.3538791 | -0.1226982 | -0.1914873  | -0.2380922  | -0.3955924 | -0.1436178  | -0.2023087 | -0.2449139 | -0.0989127  |
| Ipatasertib_1924      | -0.4772454  | -0.2564592 | -0.3328474 | -0.1468562 | -0.2130676  | -0.289271   | -0.210748  | -0.3464276  | -0.2669697 | -0.1496433 | 0.320934959 |
| GNE-317_1926          | -0.1015389  | -0.1450002 | -0.1432881 | -0.1581862 | -0.059358   | -0.145334   | -0.1825915 | -0.4326091  | -0.2416558 | 0.12300103 | 0.23637668  |
| GSK278215A_1927       | -0.44424645 | 0.05003009 | -0.1304864 | -0.0679639 | -0.2049693  | 0.14304293  | 0.25083626 | -0.422361   | -0.4541744 | -0.2021869 | 0.24679261  |
| I-BRD9_1928           | -0.3972668  | -0.0859848 | -0.2346467 | -0.1028387 | -0.1894624  | -0.0999901  | -0.0321377 | -0.440372   | -0.4584602 | -0.1560569 | 0.23525456  |
| MIRA-1_1931           | -0.4076419  | 0.03840341 | -0.0542266 | -0.036135  | -0.1689547  | 0.08489503  | 0.1649025  | -0.4348361  | -0.487401  | -0.1525971 | 0.28479529  |
| NVP-ADW742_1932       | -0.2449702  | -0.1737265 | -0.2259945 | -0.1424614 | -0.2340641  | -0.1062967  | -0.1659484 | -0.3481325  | -0.2019129 | -0.0595204 | 0.32035227  |
| P22077_1933           | -0.5293775  | -0.1171051 | -0.2314114 | 0.02058112 | -0.2919125  | 0.06611555  | 0.19059591 | -0.2669502  | -0.3213646 | -0.2880112 | 0.15350506  |
| Savolitinib_1936      | -0.1225208  | 0.07672051 | -0.1750437 | -0.1504015 | -0.1538578  | 0.1950356   | 0.12273771 | -0.1403369  | -0.2178893 | -0.3001705 | -0.1058341  |
| UMI-77_1939           | -0.3892387  | 0.00379134 | -0.1343877 | -0.1130936 | -0.1632633  | 0.23730745  | 0.18137652 | -0.160289   | -0.1909129 | -0.3899024 | -0.1167299  |
| WIKI4_1940            | -0.4269364  | -0.2746204 | -0.3661981 | -0.207301  | -0.1746506  | 0.06062771  | -0.2593204 | -0.1851951  | -0.35537   | -0.4466158 | -0.2337981  |
| Sepantronium bromide  | -0.2541227  | -0.0917521 | -0.1119212 | 0.04414079 | -0.0607132  | 0.22704765  | 0.14674994 | 0.10902143  | 0.10208534 | -0.2947576 | -0.2037709  |
| BIBR-1532_2043        | -0.1369043  | 0.30123809 | 0.20618896 | 0.05154205 | -0.0325469  | 0.22601567  | 0.33669148 | -0.3080938  | -0.2430575 | 0.09918364 | 0.37762927  |
| Pyridostatin_2044     | -0.3935225  | 0.0762573  | -0.0840074 | -0.0640067 | -0.15797    | 0.07272089  | 0.13480458 | -0.3203417  | -0.2982233 | -0.1368864 | 0.19646755  |
| AMG-319_2045          | -0.1926582  | 0.23173136 | 0.00144634 | -0.1209715 | 0.09538418  | 0.03965166  | 0.11041949 | -0.5104454  | -0.623113  | -0.0829403 | 0.32082896  |
| VX-11e_2096           | -0.065246   | -0.2580529 | -0.3163684 | -0.3045153 | -0.0993801  | -0.1438072  | -0.4000393 | -0.1802242  | -0.1840007 | -0.0914727 | -0.1313939  |
| Uprosertinib_2106     | -0.4323998  | -0.1941407 | -0.2765995 | -0.1223893 | -0.1564509  | -0.208142   | -0.1597125 | -0.36963683 | -0.2508607 | -0.0717107 | 0.18428234  |
| LJI308_2107           | -0.2248029  | 0.179973   | 0.02730527 | -0.1093194 | -0.0108698  | 0.1732744   | 0.15445961 | -0.4745482  | -0.5051213 | -0.0678281 | 0.33279747  |
| AZ6102_2109           | -0.1439468  | -0.0463563 | -0.0567297 | -0.1687269 | -0.0791151  | -0.0706682  | -0.1617213 | -0.3958934  | -0.2830359 | 0.07165393 | 0.22230006  |
| GSK591_2110           | -0.1047585  | 0.23308729 | 0.11584498 | 0.0453997  | -0.057185   | 0.19422265  | 0.3639323  | -0.3027011  | -0.2828613 | 0.08409599 | 0.36482792  |
| AZD6482_2169          | 0.1335602   | 0.31973069 | 0.2051529  | -0.0350309 | 0.28809883  | -0.047246   | 0.06377273 | -0.4988251  | -0.4606097 | 0.23838077 | 0.49887883  |
| AT13148_2170          | -0.4732921  | -0.0847364 | -0.2506972 | -0.1472667 | -0.2184197  | 0.04912345  | 0.1059927  | -0.3369491  | -0.2952198 | -0.2115445 | 0.15234942  |
| BMS-754807_2171       | -0.0735246  | 0.0045091  | 0.00690945 | -0.0992627 | 0.05972144  | -0.1594055  | -0.104712  | -0.5460462  | -0.5420622 | 0.15045193 | 0.44601174  |
| JQ1_2172              | -0.1416749  | 0.08475792 | 0.05159152 | -0.0927692 | 0.07299339  | -0.0790296  | 0.00376177 | -0.5264319  | -0.3052987 | 0.03267593 | 0.41362064  |

The significance between the IC50 of various drugs and PCDI

|                  | CHEK2      | KRT18      | GAPDH      | MMP1        | CHRNA5     | TPMR34     | ITGB4      | CD79A      | CTLA4      | RRM2       | PCDI       |
|------------------|------------|------------|------------|-------------|------------|------------|------------|------------|------------|------------|------------|
| Campothecin_1003 | 0.53023248 | 1.2838E-06 | 0.38838555 | 0.17461243  | 0.85892083 | 0.09991109 | 0.00012618 | 0.3483E-14 | 2.3251E-22 | 0.70664348 | 4.8209E-08 |
| Cisplatin_1005   | 2.7933E-12 | 0.00159449 | 0.00982727 | 1.256E-06   | 0.0173851  | 0.00635752 | 1.2617E-07 | 2.4003E-19 | 1.9743E-29 | 4.7351E-10 | 0.0040071  |
| Cytarabine_1006  | 0.00525899 | 0.02309885 | 0.88953205 | 0.19268493  | 0.8713E-06 | 0.15349332 | 2.3192E-05 | 4.4713E-08 | 1.69E-12   | 3.9215E123 | 5.6675E-05 |
| Docetaxel_1007   | 3.0653E-18 | 0.00033277 | 0          | 0.30998E-08 | 2.5473E-12 | 0.14226465 | 0.49990631 | 0.00320827 | 0.11668918 | 1.1325E-22 | 3.5973E-09 |
| Gefitinib_1010   | 1.8415E-14 | 3.6641E-05 | 6.696E-06  | 0.05980098  | 0.00040521 | 0.37117301 | 5.5485E-10 | 0.22826625 | 0.09728091 | 7.4893E-09 | 0.00031481 |
| Navitoclax_1011  | 4.3591E-24 | 0.00085305 | 2.4957E-06 | 0.02935191  | 3.2991E-07 | 0.00193629 | 0.14602671 | 1.3152E-19 | 1.6873E-34 | 5.3741E-07 | 0.00046042 |
| Vorinostat_1012  | 8.2876E-07 | 0.00449559 | 0.01852351 | 0.30643769  | 0.02178616 | 0.00042457 | 6.1838E-10 | 1.6507E-14 | 9.1161E-14 | 0.72297258 | 2.9807E-15 |
| Nilotinib_1013   | 1.2619E-18 | 0.35541683 | 0.00229812 | 0.51620624  | 1.3567E-05 | 0.11942432 | 4.4453E-06 | 3.2276E-16 | 2.248E-23  | 0.00100987 | 3.2108E-10 |
| Olaparib_1017    | 0.18614203 | 2.4227E-12 | 1.2726E-05 | 0.35745462  | 0.65732898 | 1.2496E-05 | 2.6686E-11 | 1.1459E-17 | 1.673E-14  | 0.01890815 | 8.6006E-18 |
| Axitinib_1021    | 1.4371E-22 | 2.6172E-06 | 1.4424E-09 | 1.498E-05   | 0.0079123  | 6.8197E-10 | 1.0302E-10 | 8.7067E-31 | 1.3343E-41 | 0.0464E-05 | 5.5297E-07 |
| AZD7762_1022     | 8.0384E-12 | 0.73027237 | 3.5416E-11 | 3.7067E-09  | 0.12223362 | 0.00292435 | 0.50101108 | 6.6472E-10 | 1.3523E-21 | 1.8694E-22 | 0.00154854 |
| SB216763_1025    | 0.00382339 | 4.9849E-07 | 2.9202E-05 | 0.00110047  | 7.3679E-10 | 0.62358576 | 0.16512202 | 2.4256E-42 | 2.6898E-57 | 4.8512E-07 | 1.6474E-29 |
| KU-55933_1030    | 0.2811302  | 0.0001213  | 0.79492098 | 0.6822E-14  | 0.00017034 | 0.46980485 | 0.11394031 | 1.3402E-32 | 3.4978E-28 | 0.37650698 | 3.7817E-05 |
| Afatinib_1032    | 1.1623E-15 | 0.6755E-11 | 2.         |             |            |            |            |            |            |            |            |

|                     |             |            |             |            |            |            |            |            |            |             |            |
|---------------------|-------------|------------|-------------|------------|------------|------------|------------|------------|------------|-------------|------------|
| Gemcitabine_1190    | 0.14924186  | 0.00073803 | 0.4057808   | 0.00086501 | 0.85517803 | 0.17714123 | 0.09330767 | 3.4729E-15 | 1.0472E-28 | 0.00903946  | 0.00127588 |
| GSK269962A_1192     | 2.8179E-09  | 0.00235321 | 0.00631782  | 0.00037466 | 0.62381127 | 2.4347E-07 | 0.00016947 | 1.4041E-44 | 3.1955E-36 | 0.49269129  | 1.6384E-17 |
| SB505124_1194       | 9.7418E-39  | 2.0006E-25 | 0           | 7.4487E-12 | 0.00016192 | 1.9277E-06 | 7.4081E-17 | 1.1678E-17 | 1.0833E-40 | 2.8506E-39  | 7.9737E-06 |
| Tamoxifen_1199      | 0.00611335  | 0.00028336 | 0.59501553  | 0.15763205 | 0.00043668 | 8.0273E-05 | 8.2333E-12 | 5.9855E-07 | 0.09078776 | 3.75841435  | 1.9878E-06 |
| Fulvestrant_1200    | 2.6858E-14  | 0.00312065 | 0.56060065  | 0.63404565 | 0.01297709 | 0.01705649 | 8.3608E-07 | 4.1446E-19 | 6.779E-21  | 0.08231102  | 9.8499E-13 |
| EPZ004777_1237      | 5.5199E-13  | 0.00385866 | 0.77850655  | 0.03797253 | 0.09347494 | 0.12356254 | 0.0176885  | 2.0029E-33 | 5.9666E-36 | 0.03107555  | 6.9599E-13 |
| YK-4-279_1239       | 8.3547E-28  | 7.8096E-08 | 0           | 1.9852E-09 | 2.9339E-10 | 0.18281709 | 8.6425E-05 | 1.2362E-15 | 4.9458E-22 | 1.0497E-21  | 0.0315921  |
| Daporinad_1248      | 0.00129464  | 6.6092E-26 | 7.9136E-05  | 0.45121711 | 0.07160164 | 0.20326459 | 7.5955E-08 | 0.0015842  | 0.0278607  | 0.98224989  | 3.1627E-06 |
| BMS-345541_1249     | 1.1784E-36  | 7.5675E-22 | 0           | 0.00023783 | 6.6341E-18 | 9.3028E-05 | 6.183E-12  | 4.0186E-08 | 1.2492E-13 | 2.0847E-19  | 0.00863186 |
| Talazoparib_1259    | 0.01355775  | 0.00096851 | 0.14146376  | 0.28439507 | 0.00096828 | 0.16027695 | 2.2298E-06 | 3.1139E-15 | 2.4293E-14 | 0.16718188  | 3.0501E-14 |
| XAV939_1268         | 1.1656E-05  | 0.70452582 | 0.01483071  | 3.2994E-06 | 0.46489633 | 0.02634755 | 0.03984411 | 3.1935E-21 | 2.8328E-31 | 0.00113501  | 0.01569559 |
| Trametinib_1372     | 4.3147E-18  | 0.69250344 | 0.70640438  | 7.3066E-06 | 4.4257E-07 | 0.03217484 | 1.8457E-19 | 0.12966863 | 0.8728613  | 2.1422E-06  | 0.0022825  |
| Dabrafenib_1373     | 2.1409E-06  | 0.28266294 | 0.000465    | 2.0402E-05 | 7.99E-05   | 0.38787224 | 0.78806182 | 1.4696E-23 | 1.4349E-16 | 0.00663136  | 0.0008339  |
| Temozolomide_1375   | 4.2664E-10  | 0.14970648 | 0.03940797  | 0.00871219 | 0.00513239 | 0.07463255 | 0.05082858 | 1.7649E-22 | 1.0237E-22 | 1.2655E-06  | 0.00222668 |
| AZD5438_1401        | 2.1794E-06  | 0.80703694 | 0.02677465  | 8.355E-07  | 0.04248426 | 0.90051882 | 0.57890527 | 5.322E-23  | 1.8334E-17 | 0.05576117  | 0.00012853 |
| IAP_5620_1428       | 0.0291249   | 6.8501E-10 | 0.00875792  | 0.38646361 | 0.94981172 | 3.6894E-13 | 9.3749E-22 | 0.00595951 | 0.01353431 | 0.13831447  | 0.00211879 |
| AZD2014_1441        | 0.72417228  | 0.04021545 | 0.01772064  | 1.0974E-07 | 0.78252173 | 0.02135671 | 2.9503E-12 | 1.6648E-18 | 4.7664E-06 | 0.00263103  | 0.00033593 |
| AZD1208_1449        | 0.00132852  | 4.1755E-08 | 0.00030653  | 0.6216019  | 0.03267702 | 0.00435518 | 3.6946E-08 | 1.2264E-19 | 1.0333E-19 | 1.2655E36   | 4.1392E-21 |
| AZD1332_1463        | 0.00026363  | 0.03523158 | 0.00181488  | 2.3706E-11 | 0.41664994 | 0.00637475 | 7.9331E-12 | 1.6016E-21 | 7.3875E-21 | 0.63575388  | 0.00390163 |
| Ruxolitinib_1507    | 1.1252E-11  | 0.42125668 | 0.02879272  | 0.01225931 | 0.12866602 | 0.27990813 | 0.84633102 | 3.2632E-20 | 2.0589E-51 | 2.0121E-05  | 4.5598E-06 |
| Linsitinib_1510     | 0.9416E-21  | 1.8972E-07 | 3.8861E-06  | 0.68231937 | 5.5489E-13 | 0.0540241  | 0.08428954 | 2.1549E-13 | 1.4569E-06 | 0.01773942  | 0.00325198 |
| Epirubicin_1511     | 0.47533808  | 4.7856E-08 | 0.00057486  | 0.17205476 | 0.06044981 | 0.0001816  | 0.00091101 | 1.4675E-13 | 2.1368E-13 | 0.01021874  | 1.6197E-11 |
| Cyclophosphamide_1  | 2.0629E-11  | 0.00042817 | 0.58656545  | 0.26150112 | 0.04774495 | 0.00415704 | 1.4937E-07 | 3.3251E-21 | 1.3119E-20 | 0.12748481  | 1.3261E-12 |
| Sapitinib_1549      | 0.00731226  | 4.1335E-06 | 0.0039891   | 0.14068329 | 0.07178163 | 9.2237E-06 | 6.8437E-06 | 0.50112892 | 0.01937989 | 0.55610024  | 1.0063E-05 |
| Uprosertib_1553     | 1.0548E-05  | 0.136365   | 0.01557852  | 0.10869043 | 0.23028405 | 8.2315E-05 | 1.0777E-06 | 1.2674E-15 | 7.279E-07  | 0.00566791  | 8.8256E-10 |
| Lapatinib_1558      | 5.4389E-35  | 2.1686E-16 | 0           | 0.00367222 | 1.0083E-12 | 0.00382434 | 1.0683E-07 | 0.00066118 | 0.00348104 | 1.0014E-15  | 5.9745E-05 |
| EPZ5676_1563        | 2.1822E-08  | 3.3052E-05 | 0.76758723  | 0.28069023 | 0.05950645 | 0.00075972 | 6.7235E-05 | 5.4535E-19 | 4.1234E-26 | 0.00871399  | 3.0276E-09 |
| SCH772984_1564      | 1.755E-10   | 0.72551487 | 0.48463161  | 1.1906E-05 | 0.00683888 | 0.28829851 | 4.859E-12  | 0.01179683 | 0.03384175 | 0.03245019  | 6.9026E-07 |
| IWP-2_1576          | 2.1334E-20  | 0.47900517 | 4.5403E-06  | 0.00587974 | 5.9208E-06 | 0.19357055 | 0.49118236 | 3.4175E-22 | 8.1094E-38 | 9.0123E-10  | 0.004836   |
| Flunolomide_1578    | 7.62E-07    | 0.30187936 | 0.96408567  | 0.73923457 | 0.33478535 | 0.46451165 | 0.04322469 | 5.1363E-18 | 3.6777E-19 | 0.90743093  | 6.6162E-12 |
| Entinostat_1593     | 0.18347043  | 4.6756E-11 | 0.1149201   | 0.0326473  | 0.80187762 | 1.0238E-08 | 2.2488E-10 | 3.2752E-14 | 1.3219E-21 | 0.14274461  | 2.8053E-06 |
| LGK974_1598         | 1.4006E-16  | 0.01573202 | 0.00135343  | 0.60984127 | 1.4543E-11 | 0.01351815 | 0.03691096 | 2.8902E-14 | 5.7727E-10 | 8.3924E-05  | 0.00046812 |
| WZ4003_1614         | 0.007365228 | 0.35974899 | 0.08019108  | 3.0656E-07 | 0.02422346 | 0.67396753 | 0.01035435 | 6.1569E-39 | 1.8515E-33 | 0.10940662  | 4.3944E-10 |
| CZC24832_1615       | 2.1536E-09  | 0.04997484 | 0.01393909  | 4.5106E-06 | 0.48696726 | 0.37946062 | 0.75042716 | 1.2217E-42 | 2.3808E-62 | 0.00117162  | 6.7399E-11 |
| GSK2606414_1618     | 5.1217E-10  | 0.00076732 | 5.3748E-09  | 2.9203E-07 | 0.11064354 | 0.0022987  | 3.2815E-09 | 9.6553E-22 | 1.1211E-28 | 0.00195266  | 1.0025544  |
| PF13_1620           | 3.7522E-11  | 0.00209424 | 0.28489875  | 0.00153788 | 0.94292363 | 0.00486145 | 0.02583315 | 6.7518E-30 | 3.2454E-46 | 0.00051461  | 9.9716E-10 |
| PCI-34051_1621      | 0.3168764   | 5.1669E-11 | 0.90789E-09 | 0.36778891 | 0.10831493 | 3.5732E-06 | 1.3007E-07 | 1.1021E-29 | 1.2782E-27 | 0.00014519  | 1.1543E-31 |
| Wnt-C59_1622        | 6.2314E-26  | 0.01179742 | 0.0005071   | 9.95071847 | 2.8509E-08 | 0.63669651 | 0.03285072 | 4.1636E-21 | 7.8236E-22 | 0.00074669  | 1.6364E-09 |
| I-BET-762_1624      | 0.34331695  | 6.3335E-07 | 0.13256425  | 9.1743E-06 | 0.00683309 | 1.2E-07    | 0.25414029 | 1.3582E-16 | 2.9126E-17 | 0.96196536  | 0.00042639 |
| RVX-208_1625        | 4.3919E-09  | 0.09057586 | 7.6696E-06  | 5.7312E-08 | 0.01644241 | 0.00356644 | 0.0859422  | 5.3153E-31 | 3.0423E-40 | 1.0391E-07  | 0.00353555 |
| OTX015_1626         | 0.00537366  | 3.1047E-07 | 0.42797038  | 0.00016303 | 1.4424E-05 | 9.8852E-12 | 0.82590986 | 5.2023E-08 | 1.7213E-06 | 0.0229762   | 0.01368635 |
| GSK343_1627         | 0.00116759  | 2.6255E-08 | 0.08316857  | 0.01809039 | 0.20709567 | 0.00049067 | 0.00295802 | 4.9239E-32 | 2.1956E-42 | 0.88729336  | 3.2889E-9  |
| ML323_1629          | 7.786E-39   | 1.0063E-08 | 5.3753E-12  | 7.89097471 | 3.9453E-23 | 0.04149984 | 0.04322914 | 1.255E-10  | 3.6685E-08 | 5.826E-10   | 0.02252573 |
| PRT062607_1631      | 0.0121264   | 0.95080008 | 0.112339    | 5.6423E-05 | 0.06421355 | 0.02526491 | 1.7819E-06 | 8.1174E-44 | 7.8825E-47 | 0.14355939  | 3.7547E-12 |
| Ribociclib_1632     | 6.4945E-07  | 0.00265265 | 1.7348E-05  | 4.2549E-05 | 0.88344254 | 1.0009E-07 | 3.1744E-05 | 1.1012E-55 | 9.3799E-74 | 0.19539448  | 1.6071E-14 |
| AGI-6780_1634       | 6.7527E-08  | 0.00012045 | 0.2013036   | 0.74886962 | 0.00148706 | 0.00545217 | 3.4027E-12 | 5.3107E-16 | 7.4291E-13 | 0.29920479  | 3.1971E-13 |
| Picolinic-acid_1635 | 0.00293518  | 1.6964E-06 | 0.17418304  | 0.03929699 | 0.53716194 | 0.00912302 | 0.00012838 | 3.0342E-29 | 4.4715E-33 | 0.83808729  | 9.3985E-16 |
| AZD5153_1706        | 0.13277871  | 2.5925E-05 | 0.02117918  | 0.15168017 | 0.01384743 | 2.8651E-08 | 0.26349483 | 1.9272E-19 | 1.7897E-09 | 0.00012367  | 1.6491E-09 |
| CDK9_5576_1708      | 6.4949E-06  | 0.32060927 | 0.19775574  | 0.00011326 | 0.00240009 | 0.22460769 | 0.24807492 | 7.3556E-19 | 4.9375E-13 | 0.75348059  | 2.5927E-06 |
| CDK9_5038_1709      | 2.6513E-08  | 0.51848114 | 0.98199425  | 0.00369557 | 0.09840624 | 0.46969997 | 0.29230931 | 1.2622E-22 | 1.1073E-31 | 0.6437991   | 3.0237E-08 |
| ERK_2440_1713       | 2.4141E-15  | 0.01076075 | 0.2352385   | 3.4405E-07 | 0.2006614  | 0.57007628 | 2.676E-11  | 1.0226E-07 | 4.6739E-14 | 2.7969E-09  | 0.00045994 |
| ERK_6604_1714       | 4.9352E-10  | 0.43985051 | 0.17058242  | 1.5146E-09 | 0.00807856 | 0.80119269 | 6.1095E-11 | 0.15008949 | 0.31283661 | 0.0852645   | 4.5402E-08 |
| IRAK4_4710_1716     | 0.00398061  | 0.00041451 | 0.13363673  | 0.68113007 | 0.00883746 | 0.00351503 | 1.4735E-06 | 1.6407E-10 | 4.5472E-07 | 0.18812377  | 1.1327E-07 |
| JAK1_8709_1718      | 0.36717885  | 0.00043539 | 2.6116E-05  | 0.43123824 | 0.65338115 | 0.01422825 | 0.00159314 | 1.1279E-16 | 1.5553E-09 | 5.5004E-11  | 3.1977E-24 |
| AZD5991_1720        | 7.0093E-12  | 0.00086666 | 0.68247557  | 0.15105437 | 0.00408628 | 1.414E-05  | 3.094E-13  | 1.1668E-10 | 2.7647E-08 | 0.009720077 | 2.9168E-11 |
| PAK_5339_1730       | 3.0161E-20  | 0.00628673 | 5.8121E-06  | 0.03853231 | 6.3575E-05 | 0.69283735 | 0.05887023 | 3.1477E-30 | 1.1171E-24 | 0.0052494   | 0.00013016 |
| TAF1_5496_1732      | 0.02321311  | 0.00042882 | 3.6559E-07  | 0.00022536 | 1.9446E-07 | 0.52999876 | 8.7429E-19 | 0.00199047 | 0.4395359  | 0.00151958  | 5.5317E-16 |
| JAK_8517_1739       | 0.80844392  | 0.00022465 | 0.14410343  | 7.4858E-07 | 0.00671213 | 0.18387411 | 0.00437473 | 6.9365E-14 | 1.306E-12  | 0.16739867  | 0.00105105 |
| AZD4547_1786        | 1.5732E-07  | 0.17868004 | 0.23298631  | 0.35340065 | 7.8407E-12 | 0.0459191  | 2.4822E-08 | 7.5247E-10 | 0.0472502  | 0.10377785  | 0.00036234 |
| Zoledronate_1802    | 1.8368E-08  | 0.02662519 | 0.8282037   | 0.31769319 | 0.06172452 | 0.12237196 | 0.02636949 | 2.6145E-22 | 5.19E-27   | 1.07920264  | 5.8943E-16 |
| Oxaliplatin_1806    | 0.61905763  | 1.2803E-06 | 5.6119E-05  | 0.22215026 | 0.53945602 | 0.12670946 | 0.00015014 | 3.2072E-14 | 4.4344E-10 | 1.3266E-07  | 8.8522E-19 |
| Carmustine_1807     | 2.7171E-13  | 0.1253072  | 0.49145667  | 0.98546562 | 1.3751E-05 | 0.00869902 | 0.00038161 | 1.0968E-09 | 1.3625E-16 | 0.0011568   | 5.3637E-05 |
| Topotecan_1808      | 0.67098808  | 2.5204E-07 | 0.06719792  | 0.48597527 | 0.33473495 | 0.05098811 | 0.00017865 | 9.1123E-16 | 4.9398E-31 | 0.76020209  | 7.2262E-11 |
| Teniposide_1809     | 0.01299894  | 0.00057902 | 0.35558293  | 0.0039387  | 0.5527971  | 0.00224603 | 0.00300909 | 1.0075E-23 | 1.1703E-42 | 0.01434128  | 6.2623E-08 |
| Mitoxantrone_1810   | 9.7929E-08  | 8.4003E-24 | 2.7393E-10  | 0.41715692 | 0.00049094 | 7.0439E-08 | 1.0605E-09 | 9.0803E-10 | 6.503E-14  | 5.493E-07   | 2.1568E-05 |
| Dactinomycin_1811   | 0.0102539   | 0.21344011 | 0.05279011  | 0.09547614 | 0.2692845  | 0.28343607 | 0.95265098 | 6.1694E-08 | 2.2545E-13 | 0.49015089  | 0.00855405 |
| Fludarabine_1813    | 0.14161179  | 0.00001198 | 0.22336262  | 1.3063E-06 | 0.0167524  | 0.01160253 | 0.52436545 | 2.8455E-20 | 5.3173E-46 | 0.19561128  | 4.659E-06  |
| Nelarabine_1814     | 1.7263E-05  | 0.00052022 | 0.21997327  | 0.06593973 | 0.40990451 | 0.05955788 | 0.130286   |            |            |             |            |

|                     |            |            |            |            |            |            |            |            |            |            |            |
|---------------------|------------|------------|------------|------------|------------|------------|------------|------------|------------|------------|------------|
| Sepantronium bromic | 4.9382E-09 | 0.0373864  | 0.01106374 | 0.31742316 | 0.16890738 | 1.907E-07  | 0.00083689 | 0.01330644 | 0.02049762 | 8.7881E-12 | 4.1734E-06 |
| BIBR-1532_2043      | 0.00184583 | 2.9016E-12 | 2.5008E-06 | 0.2429644  | 0.46111779 | 2.1732E-07 | 4.0749E-15 | 8.7151E-13 | 2.3177E-08 | 0.02439071 | 1.8429E-18 |
| Pyridostatin_2044   | 1.6011E-20 | 0.08383297 | 0.05677703 | 0.14691885 | 0.00031966 | 0.09925571 | 0.00217107 | 9.3878E-14 | 4.8756E-12 | 0.00184841 | 9.2397E-06 |
| AMG-319_2045        | 1.0686E-05 | 1.0456E-07 | 0.97387122 | 0.00598302 | 0.03044222 | 0.03360316 | 0.01216232 | 1.6248E-35 | 1.0079E-56 | 0.05998792 | 1.7586E-13 |
| VX-11e_2096         | 0.13912558 | 2.8008E-09 | 2.6077E-13 | 1.6393E-12 | 0.02410824 | 0.00106563 | 3.2637E-21 | 3.8931E-05 | 2.6525E-05 | 0.03797237 | 0.0031967  |
| Uprosertib_2106     | 7.0727E-25 | 9.1079E-06 | 2.0248E-10 | 0.00541635 | 0.00036556 | 1.8952E-06 | 0.00027367 | 4.3049E-18 | 7.8501E-09 | 0.08018117 | 3.2636E-05 |
| LJI308_2107         | 2.5319E-07 | 3.9927E-05 | 0.53627677 | 0.01305493 | 0.80561769 | 7.7305E-05 | 0.00043504 | 2.7877E-30 | 1.0638E-34 | 0.12422125 | 1.9003E-14 |
| AZ6102_2109         | 0.0010536  | 0.29371754 | 0.19861473 | 0.00011941 | 0.07283613 | 0.10919464 | 0.00022834 | 9.0137E-21 | 6.0809E-11 | 0.10432811 | 4.8695E-07 |
| GSK591_2110         | 0.01740124 | 8.7657E-08 | 0.00853337 | 0.3038041  | 0.19509893 | 1.096E-05  | 1.4232E-17 | 2.2507E-12 | 6.2545E-11 | 0.05649678 | 2.9992E-17 |
| AZD6482_2169        | 0.00238774 | 1.0517E-13 | 2.8131E-06 | 0.42760976 | 2.6661E-11 | 0.28454098 | 0.14840498 | 9.4101E-34 | 2.4389E-28 | 4.3577E-08 | 6.0116E-33 |
| AT13148_2170        | 4.144E-30  | 0.05463588 | 9.0452E-09 | 0.00080176 | 5.579E-07  | 0.26581515 | 0.01611528 | 3.8725E-15 | 8.1278E-12 | 1.2727E-06 | 0.00061493 |
| BMS-754807_2171     | 0.09556608 | 0.91869341 | 0.87565887 | 0.02427675 | 0.17598853 | 0.00028129 | 0.01745142 | 2.3255E-41 | 1.1366E-40 | 0.00061363 | 6.5701E-26 |
| JQ1_2172            | 0.001266   | 0.05457436 | 0.24242259 | 0.0353181  | 0.52617769 | 0.07314683 | 0.93213332 | 4.6992E-38 | 8.5352E-53 | 0.45934211 | 3.626E-22  |
